# Supplementary material for: To photodeprotect or not: effect of the oxidation state of the sulfur atom of thiochromone derivatives
Source: Royal Society of Chemistry journal article supplement (doi:10.1039/d2cc04650d), 2022-01-01
Supplement: d2cc04650d1.pdf [file d2cc04650d1.pdf]

## Supporting Information

### To Photodeprotection or Not: Effect of the Oxidation State of Sulfur Atom of Thiochromone Derivatives

Xuyang Li,<sup>b,+</sup> Yan Guo,<sup>a,+</sup> Tongyu Xu,<sup>b</sup> Jialin Wang,<sup>b</sup> Mingdong Dai,<sup>b</sup> Kiyomi Kakiuchi,<sup>c</sup> Tsumoru Morimoto,<sup>c</sup> and Jiani Ma<sup>\*,a</sup>

<sup>a</sup> Key Laboratory of Applied Surface and Colloid Chemistry, Ministry of Education, School of Chemistry and Chemical Engineering, Shaanxi Normal University, Xi'an 710119, China

<sup>b</sup> Key Laboratory of Synthetic and Natural Functional Molecule Chemistry of Ministry of Education, College of Chemistry and Materials Science, Northwest University, Xi'an, 710127, P. R. China

<sup>c</sup> Division of Materials Science, Graduate School of Science and Technology, Nara Institute of Science and Technology (NAIST), Takayama, Ikoma, Nara, 630-0192, Japan.

\*E-Mail: majiani@snnu.edu.cn

#### Table of Contents

| <b>Information</b>                                                                                                                                                                                                                                                                                                    | <b>Page</b> |
|-----------------------------------------------------------------------------------------------------------------------------------------------------------------------------------------------------------------------------------------------------------------------------------------------------------------------|-------------|
| Table of Contents.....                                                                                                                                                                                                                                                                                                | S1          |
| <b>S1.</b> Experimental and computational methods .....                                                                                                                                                                                                                                                               | S3          |
| <b>S2.</b> Figures and Tables.....                                                                                                                                                                                                                                                                                    | S4          |
| <b>Scheme S1.</b> The possible photodeprotection reaction mechanism of TS-PPG.....                                                                                                                                                                                                                                    | S4          |
| <b>Fig. S1.</b> The fs-TA results of TC in MeOH ( $\lambda_{ex} = 266$ nm).....                                                                                                                                                                                                                                       | S4          |
| <b>Fig. S2.</b> The fs-TA results of TC in MeCN-H <sub>2</sub> O ( $\lambda_{ex} = 266$ nm). .....                                                                                                                                                                                                                    | S4          |
| <b>Fig. S3.</b> The UV-vis spectra of TC in MeCN.....                                                                                                                                                                                                                                                                 | S4          |
| <b>Fig. S4.</b> Kinetics fitting of the absorption bands at 450 nm detected by fs-TA experiments of TC in MeCN (the solid lines depict the best fit to the data). .....                                                                                                                                               | S5          |
| <b>Table S1.</b> The absorption and kinetic information of intermediate involved in the photochemical reaction of TC. ....                                                                                                                                                                                            | S5          |
| <b>Fig. S5.</b> Steady state absorption spectra of TS-PPG in (a) MeCN and (b) MeOH recorded at different irradiation times upon 266 nm light.....                                                                                                                                                                     | S5          |
| <b>Fig. S6.</b> Steady state absorption spectra of TS-PPG in MeCN-H <sub>2</sub> O recorded at different irradiation times upon 266 nm light. ....                                                                                                                                                                    | S6          |
| <b>Fig. S7.</b> (Red line) the ns-TR <sup>2</sup> spectra of TS-PPG in MeOH under 266 nm irradiation. (Blue line) the calculated normal Raman spectrum of the photodeprotection reaction product (TD- $\omega$ B97X-D /6-311G** (MeOH) with a scale factor of 1.00 and a half-width of 2000 cm <sup>-1</sup> ). ..... | S6          |
| <b>Fig. S8.</b> Comparison of the 983 fs fs-TA spectrum of TS-PPG in MeCN with the calculated UV-vis spectra of TS-PPG(T). (TD- $\omega$ B97X-D /6-311G** (MeCN) with a scale factor of 1.00 and a half-width of 2000 cm <sup>-1</sup> ). .....                                                                       | S6          |
| <b>Fig. S9.</b> Comparison of the fs-TA spectrum of TS-PPG in MeCN with the calculated UV-vis spectra of (a) IM1 and (b) IM2. (TD- $\omega$ B97X-D /6-311G** (MeCN) with a scale factor of 1.00 and a half-                                                                                                           |             |

---

|                                                                                                                                                                                                                                                                                                 |        |
|-------------------------------------------------------------------------------------------------------------------------------------------------------------------------------------------------------------------------------------------------------------------------------------------------|--------|
| width of 2000 $\text{cm}^{-1}$ ).....                                                                                                                                                                                                                                                           | S6     |
| <b>Fig. S10.</b> Reactive energy profile obtained from (U) $\omega$ B97X-D /6-311+G** calculation for the photodeprotection of TS-PPG in MeCN.....                                                                                                                                              | S7     |
| <b>Fig. S11.</b> Decay-associated difference spectra (DADS) of the fs-TA signals of TS-PPG in MeCN. ....                                                                                                                                                                                        | S7     |
| <b>Table S2.</b> The absorption and kinetic information of the intermediates involved in the photochemical reaction of TS-PPG. ....                                                                                                                                                             | S7     |
| <b>Fig. S12.</b> The spin distributions for (left) TC(T) and (right) TS-PPG(T). ....                                                                                                                                                                                                            | S8     |
| <b>Fig. S13.</b> Reactive energy profile obtained from (U) $\omega$ B97X-D /6-311+G** calculation for the cyclization reaction of TC in MeCN. ....                                                                                                                                              | S8     |
| <b>Fig. S14.</b> The fs-TA results of TS-PPG in MeOH ( $\lambda_{\text{ex}} = 266 \text{ nm}$ ). ....                                                                                                                                                                                           | S8     |
| <b>Fig. S15.</b> fs-TA of TS-PPG in MeCN-H <sub>2</sub> O (v: v= 1:1) ( $\lambda_{\text{ex}} = 266 \text{ nm}$ ). ....                                                                                                                                                                          | S9     |
| <b>Fig. S16.</b> The C–O bond distances of TS-PPG(S <sub>0</sub> ) in different solvents and with 1H <sub>2</sub> O. ....                                                                                                                                                                       | S9     |
| <b>Fig. S17.</b> The C–O bond distances of TS-PPG(S <sub>1</sub> ) in different solvents and with 1H <sub>2</sub> O. ....                                                                                                                                                                       | S9     |
| <b>Fig. S18.</b> Comparison of the fs-TA spectrum of TS-PPG in MeCN-H <sub>2</sub> O with the calculated UV–vis spectra of (a) IM3(S <sub>1</sub> ) and (b) IM3 (TD- $\omega$ B97X-D /6-311G** (H <sub>2</sub> O) with a scale factor of 1.00 and a half-width of 2000 $\text{cm}^{-1}$ ). .... | S10    |
| <b>Fig. S19.</b> The dihedral angle of cation intermediates produced from the heterolytic cleavage of (left) TC (S <sub>1</sub> ) and (right) TS-PPG(S <sub>1</sub> ). ....                                                                                                                     | S10    |
| <b>Fig. S20.</b> DADS of the fs-TA signals of TS-PPG in MeCN-H <sub>2</sub> O.....                                                                                                                                                                                                              | S10    |
| <b>Scheme S2.</b> The synthetic route of TC.....                                                                                                                                                                                                                                                | S11    |
| <b>Scheme S3.</b> The synthetic route of TS-PPG. ....                                                                                                                                                                                                                                           | S11    |
| <b>Fig. S21.</b> The <sup>1</sup> H NMR spectra of TC in CDCl <sub>3</sub> . ....                                                                                                                                                                                                               | S12    |
| <b>Fig. S22.</b> The <sup>13</sup> C NMR spectra of TC in CDCl <sub>3</sub> . ....                                                                                                                                                                                                              | S12    |
| <b>Fig. S23.</b> The <sup>1</sup> H NMR spectra of TS-PPG in CDCl <sub>3</sub> . ....                                                                                                                                                                                                           | S13    |
| <b>Fig. S24.</b> The <sup>13</sup> C NMR spectra of TS-PPG in CDCl <sub>3</sub> . ....                                                                                                                                                                                                          | S13    |
| Cartesian coordinates and total energies for the optimized geometry for the compounds and intermediates considered in this paper are given.....                                                                                                                                                 | S14-38 |
| Notes and references.....                                                                                                                                                                                                                                                                       | S39    |

---

## S1. Experimental and computational methods

Compounds TC and TS-PPG were synthesized using previously reported methods,<sup>1</sup> and the relative synthesis routes were shown in Scheme S2 and S3, and <sup>1</sup>H NMR and <sup>13</sup>C NMR were used to characterize the prepared sample (Figure S21–S24).

Steady-state photolysis experiments were performed in a photochemical reactor PRP-100 (Rayonet, 254 nm). Samples were prepared in the dark and degassed by purifying Ar 30 min. UV–vis spectra were recorded on a UV–1700 spectrophotometer (Shimadzu) after different irradiate time.

The apparatus and methods of fs-TA measurements<sup>2</sup> has been detailed previously. Here is a simple description, a commercial regenerative amplified Ti:Sapphire laser system was employed to carry out the fs-TA measurements with an automated data acquisition system. a white continuum light (330–800 nm) was selected as the probe pulse, which was generated in a CaF<sub>2</sub> crystal by a about 5% of the amplified 800 nm output obtained from the laser system. The probe pulse was divided into two beams, one beam would pass the sample solution sealed in a 2 mm path-length cuvette, and the other was used as a reference to monitor the stability of probe pulse. And a 267 nm laser beam was employed to excite sample. At the experiments, the absorbance of samples at 267 nm was around 1.

The ns-TA experiments<sup>3</sup> were conducted on a commercial flash photolysis spectrometer (LP-980, Edinburgh Instruments). The 266 nm laser beam, generated from an Nd:YAG Q-switched laser's forth harmonic output, was selected as the pump pulse. And a pulse Xe lamp (150 W) was used as probe light. The sample solution used in fs-TA or ns-TA were degassed by purifying Ar for 30 min before measurements.

The ns-TR<sup>2</sup> measurements were done using a home-made apparatus. The 266 nm laser, yielded from the fourth harmonic of Nd:YAG Q-switched laser, used as light source. First, two Raman spectrum were obtained with a low-power laser beam and a high-power laser beam respectively. Then, A difference Raman spectrum was produced by subtracting the low-power Raman spectrum from high-power Raman spectrum with an appropriately coefficient to remove the signals of precursor and solvent Raman bands, which contained the signals of species generated during the time of laser pulse (10 ns) mainly. A backscattering geometry was used to acquire the Raman scattered, and the signal was detected with a liquid nitrogen-cooled charge-coupled device (CCD). The sample concentration was  $4 \times 10^{-4}$  M approximately.

DFT computation, employing (U)ωB97X-D<sup>4</sup> method with a 6-311G\*\* set basis, were performed to search the optimized structures of triplet state and possible intermediates existed in reactions, while the frequency computations also conducted to verify the obtained structure located at the minima point. Several key processes were studied by gaining the optimized structures of the reactant complexes (RC), transition states (TS) and product complexes (PC),<sup>5</sup> and the intrinsic reaction coordinates (IRC)<sup>6</sup> calculation were performed to confirm that the obtained TS connect the minima of RC and PC respectively. The calculation of UV–vis spectrum and excited singlet state was performed at TD-ωB97X-D /6-311G\*\* level,<sup>7</sup> the Gibbs free energies of all species involved in the reaction paths, were obtained with the addition of electronic energy (ωB97X-D /6-311+G\*\*) and thermal free energy correction (ωB97X-D /6-311G\*\*). The broken symmetry methodology was employed to gain the open-shell singlet

(OSS) configuration.<sup>8</sup> The solvent effect was considered with the solvation model based on density (SMD).<sup>9</sup> The Gaussian 16 software was used in all of computation.<sup>10</sup>

## S2. Figures and Tables

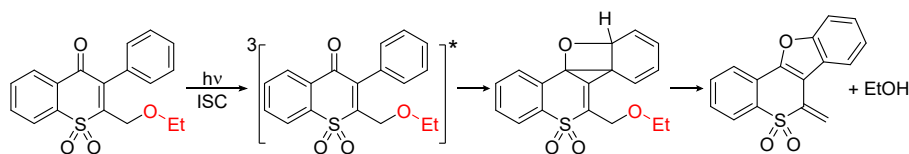

**Scheme S1.** The possible photodeprotection reaction mechanism of TS-PPG.<sup>11</sup>

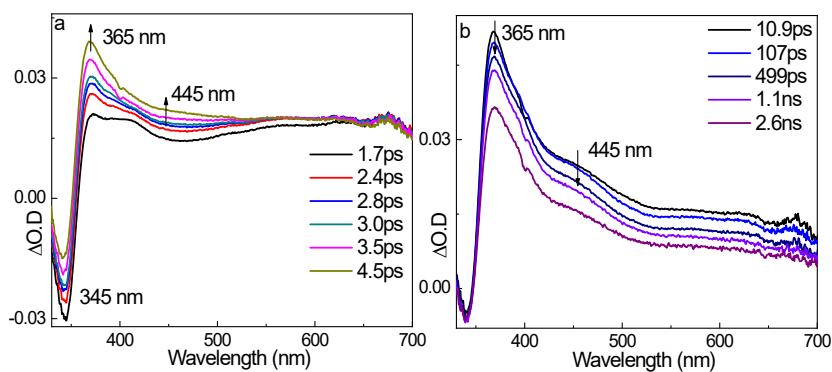

**Fig. S1.** The fs-TA results of TC in MeOH ( $\lambda_{ex} = 266$  nm).

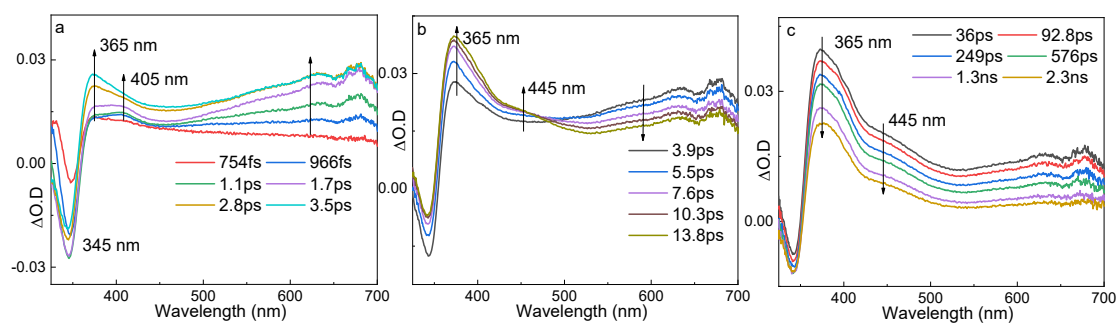

**Fig. S2.** The fs-TA results of TC in MeCN-H<sub>2</sub>O ( $\lambda_{ex} = 266$  nm).

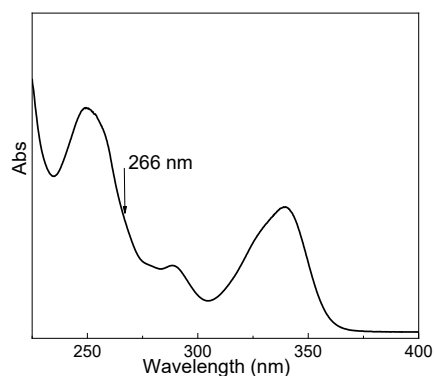

**Fig. S3.** The UV-vis spectra of TC in MeCN.

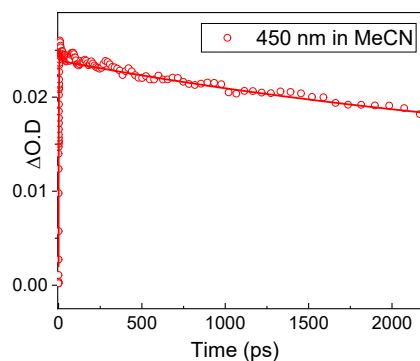

**Fig. S4.** Kinetics fitting of the absorption bands at 450 nm detected by fs-TA experiments of TC in MeCN (the solid lines depict the best fit to the data).

**Table S1.** The absorption and kinetic information of intermediate involved in the photochemical reaction of TC.

| Intermediate        | Absorption band (nm) | $\tau$ (ps) |
|---------------------|----------------------|-------------|
| TC(S <sub>n</sub> ) | 405                  | nd          |
| TC(S <sub>1</sub> ) | 365, 500-700         | 4.1         |
| TC(T)               | 365, 445             | nd          |

$\tau$ : lifetime of intermediates; nd: not determined

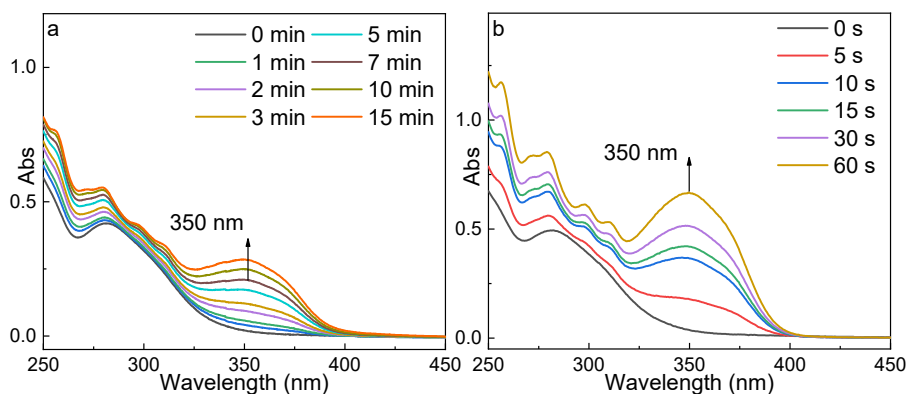

**Fig. S5.** Steady state absorption spectra of TS-PPG in (a) MeCN and (b) MeOH recorded at different irradiation times upon 266 nm light.

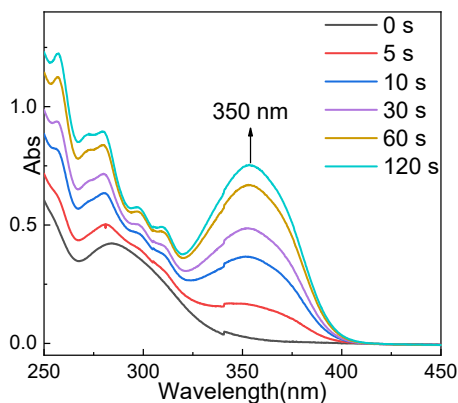

**Fig. S6.** Steady state absorption spectra of TS-PPG in MeCN-H<sub>2</sub>O recorded at different irradiation times upon 266 nm light.

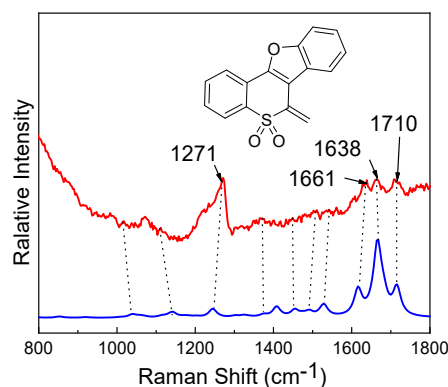

**Fig. S7.** (Red line) the ns-TR<sup>2</sup> spectra of TS-PPG in MeOH under 266 nm irradiation. (Blue line) the calculated normal Raman spectrum of the photodeprotection reaction product (TD- $\omega$ B97X-D /6-311G\*\* (MeOH) with a scale factor of 1.00 and a half-width of 2000 cm<sup>-1</sup>).

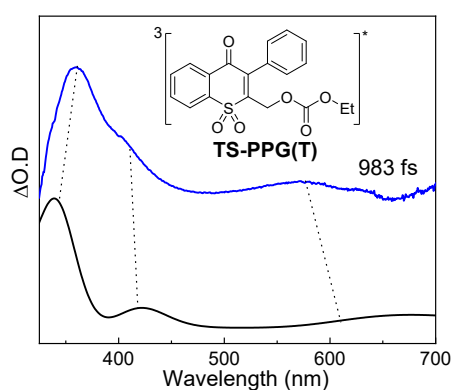

**Fig. S8.** Comparison of the 983 fs fs-TA spectrum of TS-PPG in MeCN with the calculated UV-vis spectra of TS-PPG(T). (TD- $\omega$ B97X-D /6-311G\*\* (MeCN) with a scale factor of 1.00 and a half-width of 2000 cm<sup>-1</sup>).

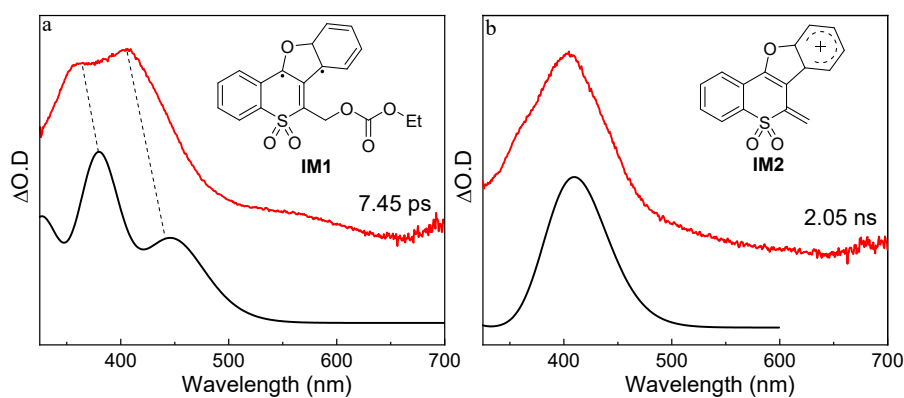

**Fig. S9.** Comparison of the fs-TA spectrum of TS-PPG in MeCN with the calculated UV-vis spectra of (a) IM1 and (b) IM2. (TD- $\omega$ B97X-D /6-311G\*\* (MeCN) with a scale factor of 1.00 and a half-width of 2000 cm<sup>-1</sup>).

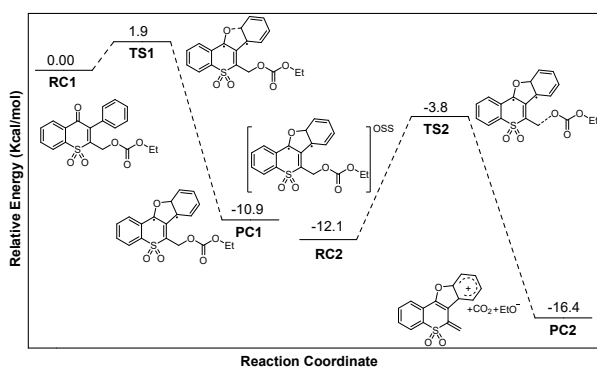

**Fig. S10.** Reactive energy profile obtained from (U)ωB97X-D /6-311+G\*\* calculation for the photodeprotection of TS-PPG in MeCN.

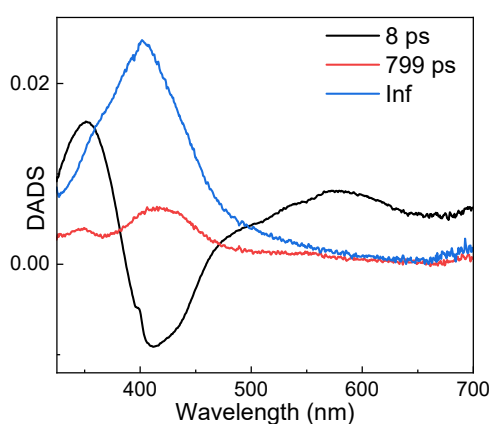

**Fig. S11.** Decay-associated difference spectra (DADS) of the fs-TA signals of TS-PPG in MeCN.

**Table S2.** The absorption and kinetic information of the intermediates involved in the photochemical reaction of TS-PPG.

| Intermediate         | Absorption band (nm) | $\tau$ (ps)                      |
|----------------------|----------------------|----------------------------------|
| TS-PPG(T)            | 360, 575             | 7.0 (in MeCN)                    |
|                      |                      | 8.0 (in MeCN-H <sub>2</sub> O)   |
| IM1                  | 360, 405             | 799.0 (in MeCN)                  |
|                      |                      | 451.0 (in MeCN-H <sub>2</sub> O) |
| IM2                  | 400                  | nd                               |
| IM3(S <sub>1</sub> ) | 510                  | nd                               |
| IM3                  | 505                  | nd                               |

$\tau$ : lifetime of intermediates; nd: not determined

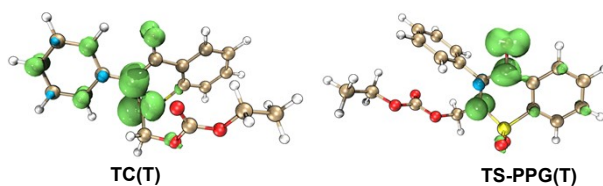

**Fig. S12.** The spin distributions for (left) TC(T) and (right) TS-PPG(T).

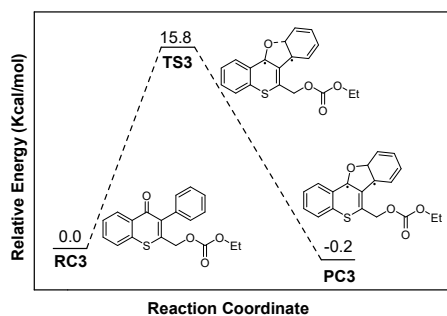

**Fig. S13.** Reactive energy profile obtained from (U) $\omega$ B97X-D /6-311+G\*\* calculation for the cyclization reaction of TC in MeCN.

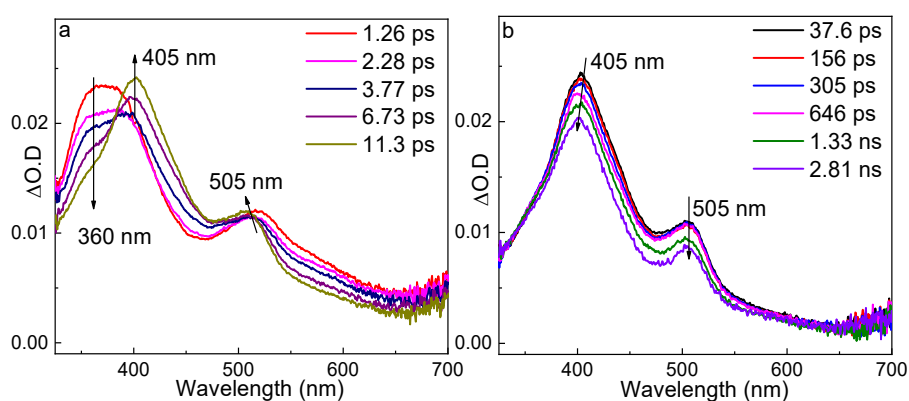

**Fig. S14.** The fs-TA results of TS-PPG in MeOH ( $\lambda_{ex} = 266$  nm).

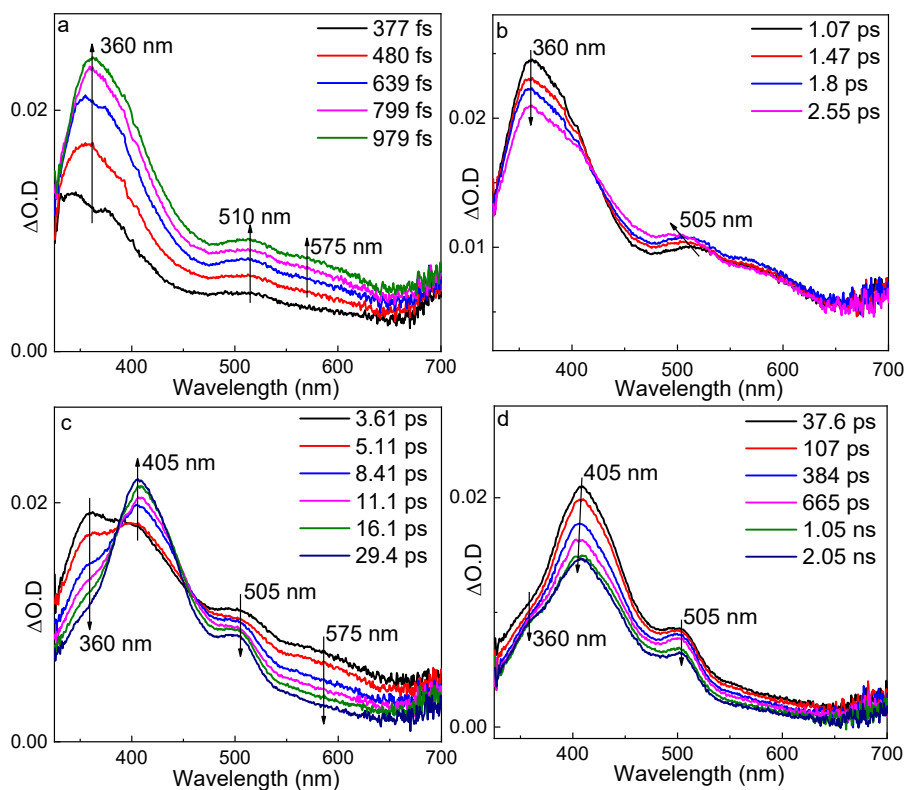



**Fig. S15.** fs-TA of TS-PPG in MeCN-H<sub>2</sub>O (v: v= 1:1) ( $\lambda_{ex}$  = 266 nm).

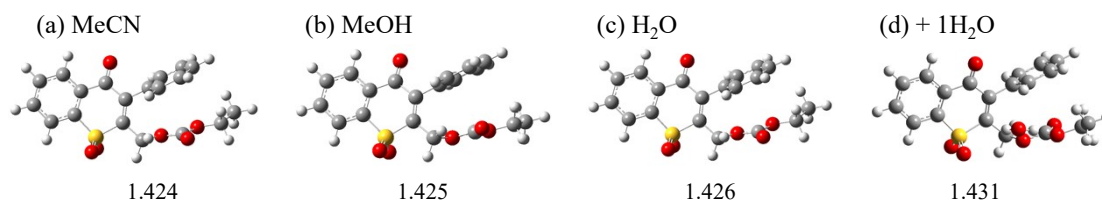

**Fig. S16.** The C–O bond distances of TS-PPG(S<sub>0</sub>) in different solvents and with 1H<sub>2</sub>O.

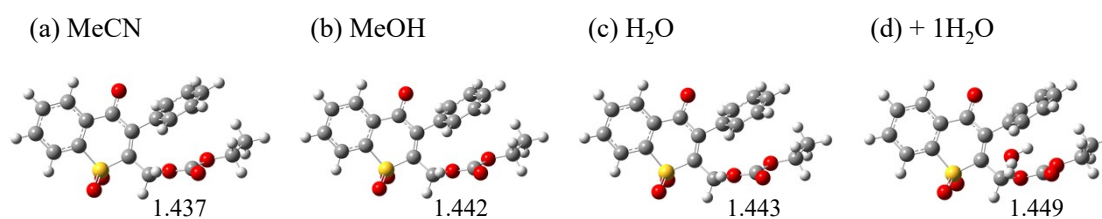

**Fig. S17.** The C–O bond distances of TS-PPG(S<sub>1</sub>) in different solvents and with 1H<sub>2</sub>O.

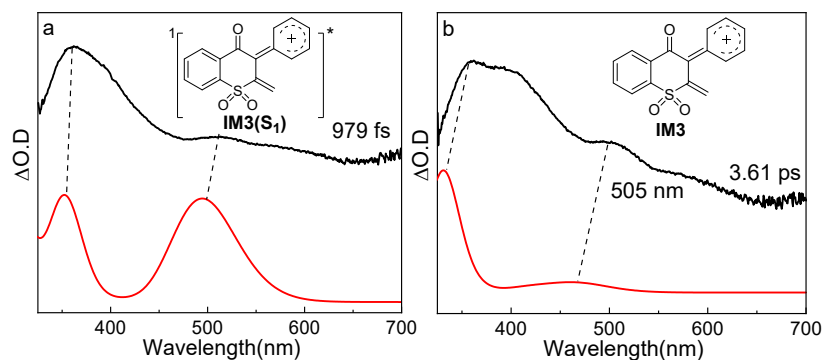

**Fig. S18.** Comparison of the fs-TA spectrum of TS-PPG in MeCN-H<sub>2</sub>O with the calculated UV–vis spectra of (a) IM3(S<sub>1</sub>) and (b) IM3 (TD- $\omega$ B97X-D /6-311G\*\* (H<sub>2</sub>O) with a scale factor of 1.00 and a half-width of 2000 cm<sup>-1</sup>).

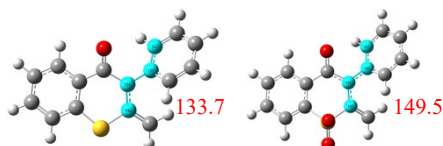

**Fig. S19.** The dihedral angle of cation intermediates produced from the heterolytic cleavage of (left) TC(S<sub>1</sub>) and (right) TS-PPG(S<sub>1</sub>).

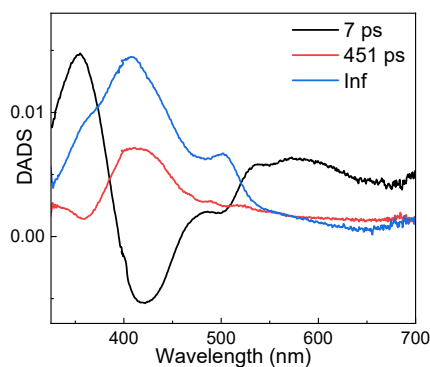

**Fig. S20.** DADS of the fs-TA signals of TS-PPG in MeCN-H<sub>2</sub>O.

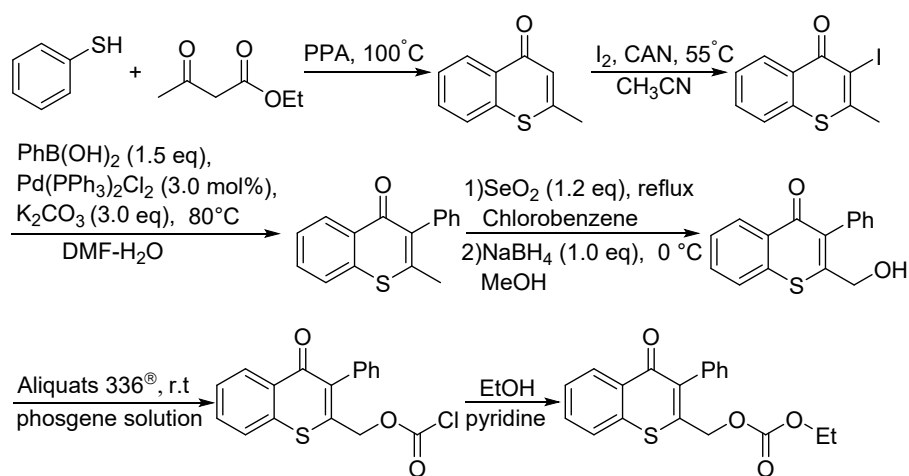

**Scheme S2.** The synthetic route of TC.

## TC

mp: 72-73 °C

<sup>1</sup>H NMR (400 MHz, CDCl<sub>3</sub>/TMS): δ (ppm): 8.51 (d, *J* = 7.7 Hz, 1H), 7.66–7.61 (m, 2H), 7.54 (m, 1H), 7.46 (t, *J* = 7.3 Hz, 2H), 7.42–7.39 (m, 1H), 7.25–7.21 (m, 2H), 5.00 (s, 2H), 4.24 (m, 2H), 1.33 (t, *J* = 7.1 Hz, 3H).

<sup>13</sup>C NMR (101 MHz, CDCl<sub>3</sub>/TMS): δ (ppm): 178.6, 154.2, 144.9, 144.2, 140.6, 134.9, 133.4, 130.8, 129.8, 129.2, 129.1, 129.0, 128.6, 123.3, 65.0, 60.6, 14.3.

HRMS (ESI): *m/z* calculated for [C<sub>19</sub>H<sub>17</sub>O<sub>4</sub>S]<sup>+</sup>: 341.0842, found: 341.0843.

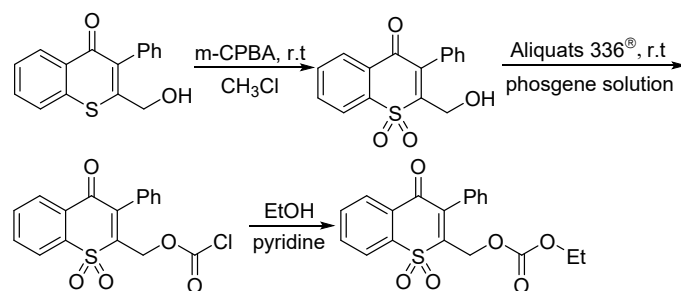

**Scheme S3.** The synthetic route of TS-PPG.

## TS-PPG

mp: 83-84 °C

$^1\text{H}$  NMR (400 MHz,  $\text{CDCl}_3/\text{TMS}$ ):  $\delta$  (ppm): (d,  $J = 6.6$  Hz, 1H), 8.12 (d,  $J = 6.7$  Hz, 1H), 7.94–7.86 (m, 1H), 7.77 (d,  $J = 7.8$  Hz, 1H), 7.51–7.45 (m, 3H), 7.33–7.28 (m, 2H), 5.10 (s, 2H), 4.19–4.24 (m, 2H), 1.31 (t,  $J = 14.3$  Hz, 3H).

$^{13}\text{C}$  NMR (101 MHz,  $\text{CDCl}_3/\text{TMS}$ ):  $\delta$  (ppm): 178.6, 154.2, 144.9, 144.2, 140.6, 134.9, 133.4, 130.8, 129.8, 129.2, 129.1, 129.0, 128.6, 123.3, 65.0, 60.6, 14.3.

HRMS (ESI):  $m/z$  calculated for  $[\text{C}_{19}\text{H}_{16}\text{O}_6\text{SNa}]^+$  : 395.0560, found: 395.0564.

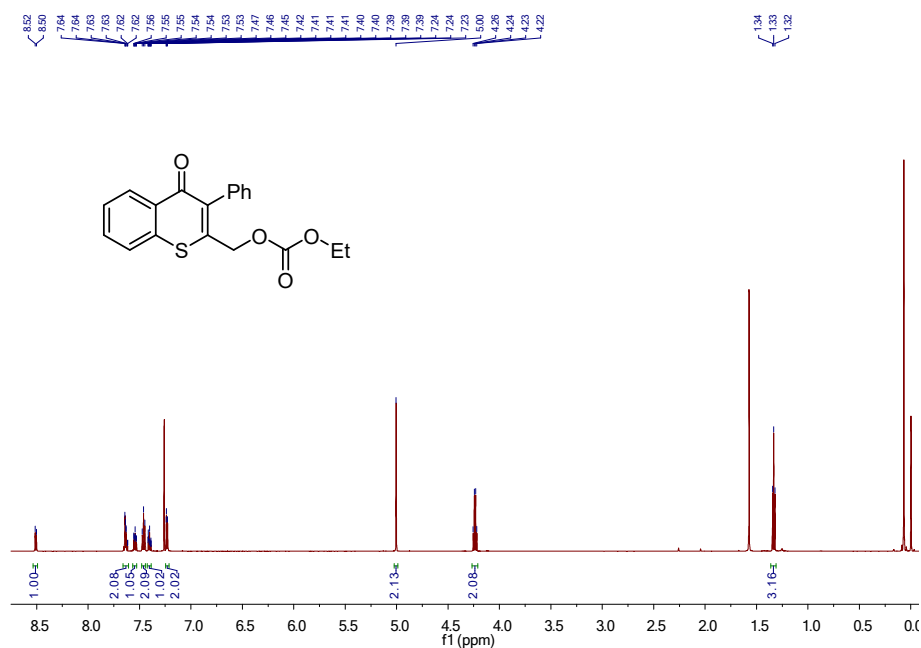

Fig. S21. The  $^1\text{H}$  NMR spectra of TC in  $\text{CDCl}_3$ .

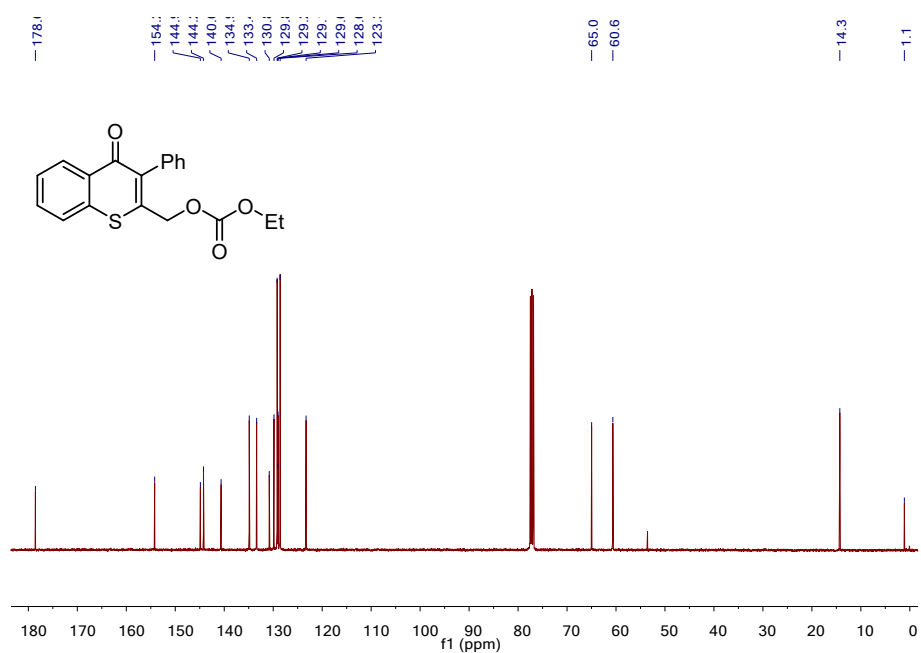

Fig. S22. The  $^{13}\text{C}$  NMR spectra of TC in  $\text{CDCl}_3$ .

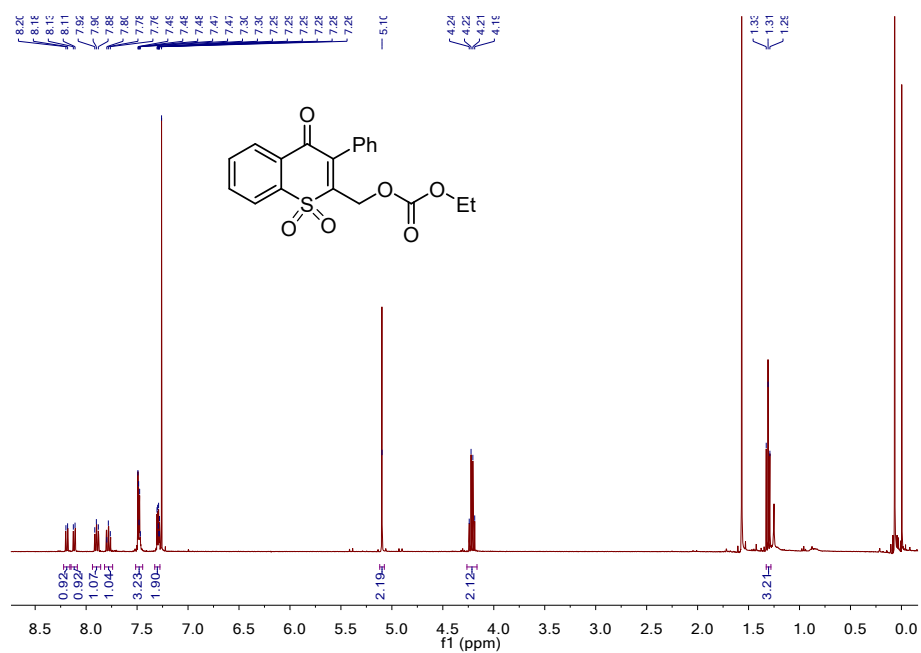

**Fig. S23.** The <sup>1</sup>H NMR spectra of TS-PPG in CDCl<sub>3</sub>.

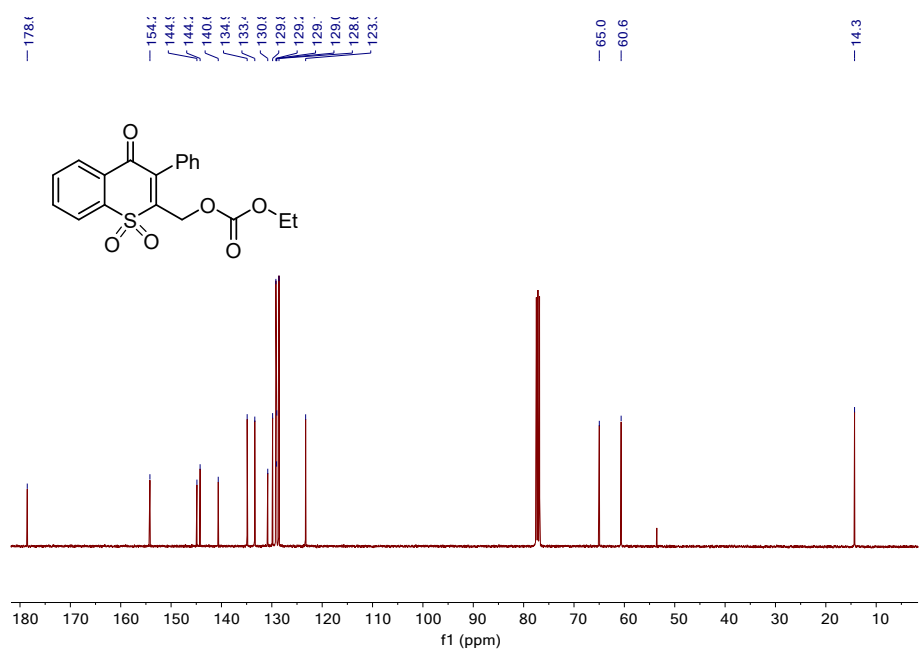

**Fig. S24.** The <sup>13</sup>C NMR spectra of TS-PPG in CDCl<sub>3</sub>.

---

Cartesian coordinates and total energies for the optimized geometry for the compounds and intermediates considered in this paper are given.

TC(T)

---

| Center<br>Number | Atomic<br>Number | Atomic<br>Type | Coordinates (Angstroms) |           |           |
|------------------|------------------|----------------|-------------------------|-----------|-----------|
|                  |                  |                | X                       | Y         | Z         |
| 1                | 6                | 0              | 3.059475                | -2.322439 | -0.503611 |
| 2                | 6                | 0              | 3.335848                | -2.179985 | 0.855625  |
| 3                | 6                | 0              | 2.388507                | -1.623825 | 1.708563  |
| 4                | 6                | 0              | 1.154054                | -1.213813 | 1.205292  |
| 5                | 6                | 0              | 0.850947                | -1.374707 | -0.155994 |
| 6                | 6                | 0              | 1.823393                | -1.928348 | -0.996319 |
| 7                | 6                | 0              | -0.467298               | 2.010132  | 1.065632  |
| 8                | 6                | 0              | -0.805112               | 0.551724  | 1.136869  |
| 9                | 6                | 0              | -1.402593               | -0.200620 | 0.018413  |
| 10               | 6                | 0              | -0.483351               | -1.038999 | -0.763635 |
| 11               | 1                | 0              | 3.803466                | -2.741998 | -1.173225 |
| 12               | 1                | 0              | 4.297193                | -2.489468 | 1.254355  |
| 13               | 1                | 0              | 1.583905                | -2.046562 | -2.047956 |
| 14               | 8                | 0              | -0.770324               | -1.501608 | -1.866835 |
| 15               | 16               | 0              | 0.003183                | -0.437664 | 2.338916  |
| 16               | 6                | 0              | -2.822888               | -0.127870 | -0.199592 |
| 17               | 6                | 0              | -3.501682               | -0.874856 | -1.196660 |
| 18               | 6                | 0              | -3.604004               | 0.717422  | 0.631085  |
| 19               | 6                | 0              | -4.873996               | -0.763295 | -1.351842 |
| 20               | 1                | 0              | -2.936978               | -1.533649 | -1.841692 |
| 21               | 6                | 0              | -4.975420               | 0.817764  | 0.468779  |
| 22               | 1                | 0              | -3.120168               | 1.295735  | 1.412855  |
| 23               | 6                | 0              | -5.620174               | 0.080814  | -0.526484 |
| 24               | 1                | 0              | -5.371112               | -1.344050 | -2.123228 |
| 25               | 1                | 0              | -5.546558               | 1.473720  | 1.118763  |
| 26               | 1                | 0              | -6.695186               | 0.161785  | -0.656428 |
| 27               | 8                | 0              | 0.951569                | 2.201144  | 0.869767  |
| 28               | 6                | 0              | 1.407136                | 1.893901  | -0.350127 |
| 29               | 8                | 0              | 0.721346                | 1.696929  | -1.329213 |
| 30               | 8                | 0              | 2.728640                | 1.846354  | -0.295608 |
| 31               | 6                | 0              | 3.396080                | 1.483682  | -1.524197 |
| 32               | 1                | 0              | 3.309556                | 2.318074  | -2.226633 |
| 33               | 1                | 0              | 2.893221                | 0.612949  | -1.952118 |
| 34               | 6                | 0              | 4.835268                | 1.181648  | -1.179859 |
| 35               | 1                | 0              | 5.373074                | 0.906162  | -2.092486 |
| 36               | 1                | 0              | 5.327324                | 2.053753  | -0.738153 |

|    |   |   |           |           |           |
|----|---|---|-----------|-----------|-----------|
| 37 | 1 | 0 | 4.896657  | 0.345630  | -0.475873 |
| 38 | 1 | 0 | 2.616441  | -1.491716 | 2.762088  |
| 39 | 1 | 0 | -1.025646 | 2.500160  | 0.265215  |
| 40 | 1 | 0 | -0.671101 | 2.509572  | 2.015349  |

Sum of electronic and zero-point Energies= -1432.310775

Sum of electronic and thermal Free Energies= -1432.363753

The number of imaginary frequencies: 0

TS-PPG(T)

| Center<br>Number | Atomic<br>Number | Atomic<br>Type | Coordinates (Angstroms) |           |           |
|------------------|------------------|----------------|-------------------------|-----------|-----------|
|                  |                  |                | X                       | Y         | Z         |
| 1                | 6                | 0              | -5.301939               | 1.438546  | -0.377541 |
| 2                | 6                | 0              | -5.604283               | 0.112892  | -0.071971 |
| 3                | 6                | 0              | -4.581954               | -0.809329 | 0.094997  |
| 4                | 6                | 0              | -3.264243               | -0.400518 | -0.044627 |
| 5                | 6                | 0              | -2.940313               | 0.933087  | -0.326887 |
| 6                | 6                | 0              | -3.987822               | 1.852198  | -0.495369 |
| 7                | 6                | 0              | 0.553901                | -1.558529 | 1.013567  |
| 8                | 6                | 0              | -0.569953               | -0.740839 | 0.447671  |
| 9                | 6                | 0              | -0.462647               | 0.587796  | 0.114636  |
| 10               | 6                | 0              | -1.553009               | 1.357383  | -0.338628 |
| 11               | 1                | 0              | -6.100921               | 2.158211  | -0.510335 |
| 12               | 1                | 0              | -6.635320               | -0.200996 | 0.034567  |
| 13               | 1                | 0              | -3.760260               | 2.891300  | -0.701208 |
| 14               | 8                | 0              | -1.316270               | 2.595362  | -0.718094 |
| 15               | 6                | 0              | 0.844011                | 1.306602  | 0.240144  |
| 16               | 6                | 0              | 1.683639                | 1.409228  | -0.868514 |
| 17               | 6                | 0              | 1.231021                | 1.864558  | 1.456333  |
| 18               | 6                | 0              | 2.900396                | 2.067969  | -0.756912 |
| 19               | 1                | 0              | 1.389750                | 0.950573  | -1.805291 |
| 20               | 6                | 0              | 2.450792                | 2.517014  | 1.564838  |
| 21               | 1                | 0              | 0.578571                | 1.776068  | 2.317819  |
| 22               | 6                | 0              | 3.285348                | 2.620593  | 0.458948  |
| 23               | 1                | 0              | 3.551858                | 2.141347  | -1.620223 |
| 24               | 1                | 0              | 2.753036                | 2.938194  | 2.516087  |
| 25               | 1                | 0              | 4.238739                | 3.129188  | 0.545929  |
| 26               | 8                | 0              | 1.602858                | -1.681745 | 0.044429  |
| 27               | 6                | 0              | 2.819508                | -1.294291 | 0.438629  |
| 28               | 8                | 0              | 3.138230                | -0.971197 | 1.550802  |
| 29               | 8                | 0              | 3.615624                | -1.329734 | -0.621323 |
| 30               | 6                | 0              | 4.964942                | -0.896280 | -0.386959 |

|    |    |   |           |           |           |
|----|----|---|-----------|-----------|-----------|
| 31 | 1  | 0 | 5.453466  | -1.606732 | 0.284674  |
| 32 | 1  | 0 | 4.938339  | 0.076490  | 0.109375  |
| 33 | 6  | 0 | 5.650440  | -0.826620 | -1.730903 |
| 34 | 1  | 0 | 6.686804  | -0.506392 | -1.600907 |
| 35 | 1  | 0 | 5.647602  | -1.802192 | -2.220496 |
| 36 | 1  | 0 | 5.145197  | -0.111613 | -2.383711 |
| 37 | 1  | 0 | -4.792226 | -1.845107 | 0.333926  |
| 38 | 1  | 0 | 0.957589  | -1.091748 | 1.913333  |
| 39 | 1  | 0 | 0.202494  | -2.559691 | 1.264122  |
| 40 | 16 | 0 | -2.004838 | -1.655196 | -0.020577 |
| 41 | 8  | 0 | -2.320352 | -2.609832 | 1.031560  |
| 42 | 8  | 0 | -1.830629 | -2.140670 | -1.379520 |

Sum of electronic and zero-point Energies= -1582.618746

Sum of electronic and thermal Free Energies= -1582.674650

The number of imaginary frequencies: 0

IM1

| Center<br>Number | Atomic<br>Number | Atomic<br>Type | Coordinates (Angstroms) |           |           |
|------------------|------------------|----------------|-------------------------|-----------|-----------|
|                  |                  |                | X                       | Y         | Z         |
| 1                | 6                | 0              | -4.474816               | -2.103848 | -0.912507 |
| 2                | 6                | 0              | -3.768762               | -3.254587 | -0.562492 |
| 3                | 6                | 0              | -2.461327               | -3.154113 | -0.108056 |
| 4                | 6                | 0              | -1.868400               | -1.904995 | -0.010418 |
| 5                | 6                | 0              | -2.569696               | -0.732095 | -0.335962 |
| 6                | 6                | 0              | -3.892419               | -0.856253 | -0.793938 |
| 7                | 6                | 0              | 1.313174                | -0.021959 | 1.848545  |
| 8                | 6                | 0              | 0.145714                | -0.190541 | 0.926888  |
| 9                | 6                | 0              | -0.705508               | 0.800247  | 0.474181  |
| 10               | 6                | 0              | -1.963257               | 0.542291  | -0.123614 |
| 11               | 1                | 0              | -5.494393               | -2.185646 | -1.270573 |
| 12               | 1                | 0              | -4.236261               | -4.228195 | -0.644001 |
| 13               | 1                | 0              | -4.444243               | 0.041365  | -1.041625 |
| 14               | 8                | 0              | -2.642952               | 1.663297  | -0.437154 |
| 15               | 6                | 0              | -0.582594               | 2.244223  | 0.493666  |
| 16               | 6                | 0              | 0.502088                | 3.090142  | 0.484305  |
| 17               | 6                | 0              | -1.961112               | 2.764412  | 0.208362  |
| 18               | 6                | 0              | 0.331743                | 4.409267  | 0.051843  |
| 19               | 1                | 0              | 1.497366                | 2.708859  | 0.669532  |
| 20               | 6                | 0              | -1.993877               | 4.040523  | -0.552179 |
| 21               | 6                | 0              | -0.901234               | 4.838760  | -0.528460 |
| 22               | 1                | 0              | 1.184755                | 5.075980  | 0.031030  |

|    |    |   |           |           |           |
|----|----|---|-----------|-----------|-----------|
| 23 | 1  | 0 | -2.924310 | 4.341542  | -1.017669 |
| 24 | 1  | 0 | -0.940474 | 5.815437  | -0.997692 |
| 25 | 8  | 0 | 2.503183  | -0.640183 | 1.356087  |
| 26 | 6  | 0 | 3.087430  | -0.041757 | 0.315172  |
| 27 | 8  | 0 | 2.777871  | 1.029700  | -0.137922 |
| 28 | 8  | 0 | 4.067864  | -0.815230 | -0.108699 |
| 29 | 6  | 0 | 4.770665  | -0.344075 | -1.271864 |
| 30 | 1  | 0 | 5.235138  | 0.617441  | -1.039040 |
| 31 | 1  | 0 | 4.047821  | -0.187622 | -2.075335 |
| 32 | 6  | 0 | 5.793463  | -1.395690 | -1.630091 |
| 33 | 1  | 0 | 6.350184  | -1.080082 | -2.515516 |
| 34 | 1  | 0 | 6.499656  | -1.545457 | -0.811136 |
| 35 | 1  | 0 | 5.304754  | -2.347067 | -1.846780 |
| 36 | 1  | 0 | -1.899193 | -4.036895 | 0.172764  |
| 37 | 1  | 0 | 1.479747  | 1.033214  | 2.064138  |
| 38 | 1  | 0 | 1.116293  | -0.556897 | 2.778781  |
| 39 | 16 | 0 | -0.139256 | -1.869313 | 0.426219  |
| 40 | 8  | 0 | 0.055228  | -2.737673 | 1.577095  |
| 41 | 8  | 0 | 0.631534  | -2.105918 | -0.784702 |
| 42 | 1  | 0 | -2.498207 | 2.911389  | 1.165697  |

Sum of electronic and zero-point Energies = -1582.636189

Sum of electronic and thermal Energies= -1582.690571

The number of imaginary frequencies: 0

IM2

| Center<br>Number | Atomic<br>Number | Atomic<br>Type | Coordinates (Angstroms) |           |           |
|------------------|------------------|----------------|-------------------------|-----------|-----------|
|                  |                  |                | X                       | Y         | Z         |
| 1                | 6                | 0              | 3.046949                | 2.703985  | -0.236965 |
| 2                | 6                | 0              | 3.932392                | 1.635881  | -0.095362 |
| 3                | 6                | 0              | 3.462367                | 0.325860  | 0.055100  |
| 4                | 6                | 0              | 2.098332                | 0.100733  | 0.052054  |
| 5                | 6                | 0              | 1.190031                | 1.170535  | -0.109218 |
| 6                | 6                | 0              | 1.674141                | 2.477835  | -0.247142 |
| 7                | 6                | 0              | -0.176498               | -2.679584 | -1.323470 |
| 8                | 6                | 0              | 0.043202                | -1.610050 | -0.562808 |
| 9                | 6                | 0              | -0.793312               | -0.409359 | -0.426653 |
| 10               | 6                | 0              | -0.221136               | 0.874472  | -0.202982 |
| 11               | 1                | 0              | 3.428646                | 3.715864  | -0.348076 |
| 12               | 1                | 0              | 5.004716                | 1.820217  | -0.098542 |
| 13               | 1                | 0              | 0.974487                | 3.300683  | -0.378742 |
| 14               | 8                | 0              | -1.113513               | 1.834214  | -0.117437 |



|    |    |   |           |           |           |
|----|----|---|-----------|-----------|-----------|
| 15 | 6  | 0 | -2.155522 | -0.220699 | -0.426842 |
| 16 | 6  | 0 | -3.279567 | -1.107724 | -0.346721 |
| 17 | 6  | 0 | -2.407468 | 1.246600  | -0.375138 |
| 18 | 6  | 0 | -4.414533 | -0.604110 | 0.204908  |
| 19 | 1  | 0 | -3.172663 | -2.166015 | -0.567129 |
| 20 | 6  | 0 | -3.547414 | 1.672044  | 0.491911  |
| 21 | 6  | 0 | -4.531743 | 0.779562  | 0.680046  |
| 22 | 1  | 0 | -5.260542 | -1.268469 | 0.373368  |
| 23 | 1  | 0 | -3.609762 | 2.708500  | 0.814313  |
| 24 | 1  | 0 | -5.436758 | 1.064501  | 1.210534  |
| 25 | 1  | 0 | 4.145642  | -0.512878 | 0.174464  |
| 26 | 1  | 0 | -1.066855 | -2.769043 | -1.943670 |
| 27 | 1  | 0 | 0.554006  | -3.486746 | -1.345711 |
| 28 | 16 | 0 | 1.507659  | -1.540798 | 0.449200  |
| 29 | 8  | 0 | 2.475093  | -2.513007 | -0.027070 |
| 30 | 8  | 0 | 1.070276  | -1.504046 | 1.837033  |
| 31 | 1  | 0 | -2.659630 | 1.572969  | -1.402511 |

Sum of electronic and zero-point Energies= -1239.424269

Sum of electronic and thermal Energies= -1239.466336

The number of imaginary frequencies: 0

IM3(S<sub>1</sub>)

| Center<br>Number | Atomic<br>Number | Atomic<br>Type | Coordinates (Angstroms) |           |           |
|------------------|------------------|----------------|-------------------------|-----------|-----------|
|                  |                  |                | X                       | Y         | Z         |
| 1                | 6                | 0              | -3.461789               | -2.481188 | -0.160508 |
| 2                | 6                | 0              | -4.204493               | -1.317133 | -0.332269 |
| 3                | 6                | 0              | -3.580905               | -0.073293 | -0.278593 |
| 4                | 6                | 0              | -2.211472               | -0.019386 | -0.055454 |
| 5                | 6                | 0              | -1.444621               | -1.180328 | 0.112666  |
| 6                | 6                | 0              | -2.088897               | -2.414438 | 0.053438  |
| 7                | 6                | 0              | 0.917462                | 2.430712  | -0.692895 |
| 8                | 6                | 0              | 0.229450                | 1.346061  | -0.264907 |
| 9                | 6                | 0              | 0.777179                | 0.066069  | -0.007290 |
| 10               | 6                | 0              | 0.032715                | -1.150606 | 0.256902  |
| 11               | 1                | 0              | -3.951055               | -3.448151 | -0.203033 |
| 12               | 1                | 0              | -5.272735               | -1.371224 | -0.511186 |
| 13               | 1                | 0              | -1.501676               | -3.319235 | 0.164324  |
| 14               | 8                | 0              | 0.686797                | -2.165035 | 0.526872  |
| 15               | 6                | 0              | 2.226054                | -0.123300 | -0.042835 |
| 16               | 6                | 0              | 2.982239                | 0.009864  | 1.174393  |
| 17               | 6                | 0              | 2.880909                | -0.446575 | -1.280935 |

|    |    |   |           |           |           |
|----|----|---|-----------|-----------|-----------|
| 18 | 6  | 0 | 4.333549  | -0.190286 | 1.145661  |
| 19 | 1  | 0 | 2.458898  | 0.264629  | 2.088511  |
| 20 | 6  | 0 | 4.232248  | -0.643820 | -1.286370 |
| 21 | 1  | 0 | 2.284158  | -0.532041 | -2.181230 |
| 22 | 6  | 0 | 4.957661  | -0.512836 | -0.079118 |
| 23 | 1  | 0 | 4.929247  | -0.102344 | 2.045531  |
| 24 | 1  | 0 | 4.755153  | -0.896275 | -2.200389 |
| 25 | 1  | 0 | 6.030891  | -0.665477 | -0.095664 |
| 26 | 1  | 0 | -4.155480 | 0.837315  | -0.410983 |
| 27 | 1  | 0 | 1.982929  | 2.382596  | -0.889856 |
| 28 | 1  | 0 | 0.418889  | 3.377657  | -0.869475 |
| 29 | 16 | 0 | -1.494094 | 1.586707  | 0.168193  |
| 30 | 8  | 0 | -2.096797 | 2.530691  | -0.773179 |
| 31 | 8  | 0 | -1.532181 | 1.920360  | 1.596439  |

Sum of electronic and zero-point Energies= -1239.498061

Sum of electronic and thermal Free Energies= -1,239.542564

The number of imaginary frequencies: 0

IM3.3H<sub>2</sub>O

| Center<br>Number | Atomic<br>Number | Atomic<br>Type | Coordinates (Angstroms) |           |           |
|------------------|------------------|----------------|-------------------------|-----------|-----------|
|                  |                  |                | X                       | Y         | Z         |
| 1                | 6                | 0              | -3.838513               | 1.925190  | -0.237317 |
| 2                | 6                | 0              | -4.394570               | 0.778450  | 0.321215  |
| 3                | 6                | 0              | -3.629911               | -0.377945 | 0.451905  |
| 4                | 6                | 0              | -2.308963               | -0.360785 | 0.027078  |
| 5                | 6                | 0              | -1.732329               | 0.780289  | -0.549308 |
| 6                | 6                | 0              | -2.519969               | 1.924284  | -0.677522 |
| 7                | 6                | 0              | 0.219239                | -2.563350 | -1.802949 |
| 8                | 6                | 0              | -0.036314               | -1.607100 | -0.909895 |
| 9                | 6                | 0              | 0.616676                | -0.305071 | -0.807429 |
| 10               | 6                | 0              | -0.332771               | 0.855462  | -1.049254 |
| 11               | 1                | 0              | -4.435096               | 2.825366  | -0.336134 |
| 12               | 1                | 0              | -5.426306               | 0.776922  | 0.654901  |
| 13               | 1                | 0              | -2.085514               | 2.815138  | -1.116242 |
| 14               | 8                | 0              | 0.050083                | 1.773298  | -1.748332 |
| 15               | 6                | 0              | 1.974724                | -0.143634 | -0.588182 |
| 16               | 6                | 0              | 2.565338                | 1.163985  | -0.475854 |
| 17               | 6                | 0              | 2.815206                | -1.297985 | -0.413718 |
| 18               | 6                | 0              | 3.916584                | 1.287458  | -0.275199 |
| 19               | 1                | 0              | 1.944910                | 2.048905  | -0.517702 |
| 20               | 6                | 0              | 4.166309                | -1.148372 | -0.225707 |

|    |    |   |           |           |           |
|----|----|---|-----------|-----------|-----------|
| 21 | 1  | 0 | 2.378887  | -2.289108 | -0.410596 |
| 22 | 6  | 0 | 4.716516  | 0.139489  | -0.165087 |
| 23 | 1  | 0 | 4.366257  | 2.269220  | -0.186736 |
| 24 | 1  | 0 | 4.800936  | -2.017322 | -0.100123 |
| 25 | 1  | 0 | 5.783361  | 0.252277  | 0.000393  |
| 26 | 1  | 0 | -4.062646 | -1.278459 | 0.874682  |
| 27 | 1  | 0 | -0.382426 | -3.466372 | -1.837595 |
| 28 | 16 | 0 | -1.350039 | -1.829301 | 0.284389  |
| 29 | 8  | 0 | -0.733615 | -1.786325 | 1.613960  |
| 30 | 8  | 0 | -2.137790 | -3.005784 | -0.074244 |
| 31 | 8  | 0 | 2.106602  | -0.196547 | 2.761115  |
| 32 | 1  | 0 | 2.918045  | 0.026621  | 2.282438  |
| 33 | 1  | 0 | 1.838460  | -1.042115 | 2.373589  |
| 34 | 8  | 0 | 0.422824  | 3.856689  | 0.404189  |
| 35 | 1  | 0 | 0.335684  | 3.000452  | 0.873010  |
| 36 | 1  | 0 | 0.095773  | 3.650060  | -0.481735 |
| 37 | 8  | 0 | 0.177011  | 1.334564  | 1.553179  |
| 38 | 1  | 0 | -0.627025 | 1.187578  | 2.068924  |
| 39 | 1  | 0 | 0.883439  | 0.838869  | 2.029850  |
| 40 | 1  | 0 | 1.009439  | -2.438569 | -2.536749 |

Sum of electronic and zero-point Energies= -1,468.74751

Sum of electronic and thermal Free Energies= -1,468.80013

The number of imaginary frequencies: 0

TS1

| Center<br>Number | Atomic<br>Number | Atomic<br>Type | Coordinates (Angstroms) |           |           |
|------------------|------------------|----------------|-------------------------|-----------|-----------|
|                  |                  |                | X                       | Y         | Z         |
| 1                | 6                | 0              | -5.224615               | 1.340757  | -0.156354 |
| 2                | 6                | 0              | -5.525063               | -0.008098 | 0.050506  |
| 3                | 6                | 0              | -4.499682               | -0.943118 | 0.115000  |
| 4                | 6                | 0              | -3.180154               | -0.520828 | -0.024168 |
| 5                | 6                | 0              | -2.855476               | 0.833899  | -0.214530 |
| 6                | 6                | 0              | -3.909310               | 1.759747  | -0.283168 |
| 7                | 6                | 0              | 0.676361                | -1.809400 | 0.754908  |
| 8                | 6                | 0              | -0.470943               | -0.930386 | 0.355967  |
| 9                | 6                | 0              | -0.389002               | 0.428707  | 0.103345  |
| 10               | 6                | 0              | -1.470292               | 1.271873  | -0.257575 |
| 11               | 1                | 0              | -6.026263               | 2.070848  | -0.209607 |
| 12               | 1                | 0              | -6.555648               | -0.329423 | 0.159714  |
| 13               | 1                | 0              | -3.677256               | 2.810079  | -0.423296 |
| 14               | 8                | 0              | -1.203112               | 2.522851  | -0.527250 |

|    |    |   |           |           |           |
|----|----|---|-----------|-----------|-----------|
| 15 | 6  | 0 | 0.804046  | 1.279648  | 0.233345  |
| 16 | 6  | 0 | 0.810490  | 2.345355  | -0.729554 |
| 17 | 6  | 0 | 1.673099  | 1.320851  | 1.312674  |
| 18 | 6  | 0 | 1.626859  | 3.487735  | -0.506564 |
| 19 | 1  | 0 | 0.534724  | 2.120660  | -1.755387 |
| 20 | 6  | 0 | 2.509960  | 2.426096  | 1.476775  |
| 21 | 1  | 0 | 1.654970  | 0.548687  | 2.073133  |
| 22 | 6  | 0 | 2.465565  | 3.516769  | 0.583178  |
| 23 | 1  | 0 | 1.627290  | 4.290235  | -1.236358 |
| 24 | 1  | 0 | 3.172116  | 2.466863  | 2.335761  |
| 25 | 1  | 0 | 3.120361  | 4.366542  | 0.746397  |
| 26 | 8  | 0 | 1.745928  | -1.635343 | -0.190993 |
| 27 | 6  | 0 | 2.976408  | -1.489517 | 0.310287  |
| 28 | 8  | 0 | 3.289431  | -1.590996 | 1.475764  |
| 29 | 8  | 0 | 3.790696  | -1.213967 | -0.697528 |
| 30 | 6  | 0 | 5.171483  | -0.988417 | -0.339697 |
| 31 | 1  | 0 | 5.563092  | -1.890390 | 0.138712  |
| 32 | 1  | 0 | 5.214867  | -0.165082 | 0.379015  |
| 33 | 6  | 0 | 5.916258  | -0.659317 | -1.612091 |
| 34 | 1  | 0 | 6.969607  | -0.479633 | -1.375318 |
| 35 | 1  | 0 | 5.858670  | -1.487332 | -2.325384 |
| 36 | 1  | 0 | 5.508692  | 0.241339  | -2.081629 |
| 37 | 1  | 0 | -4.719323 | -1.994681 | 0.271524  |
| 38 | 1  | 0 | 1.038180  | -1.572876 | 1.757724  |
| 39 | 1  | 0 | 0.384491  | -2.862167 | 0.750615  |
| 40 | 16 | 0 | -1.933204 | -1.777222 | -0.109479 |
| 41 | 8  | 0 | -2.225049 | -2.817429 | 0.885499  |
| 42 | 8  | 0 | -1.819551 | -2.224149 | -1.506449 |

Sum of electronic and zero-point Energies= -1582.667015

Sum of electronic and thermal Free Energies= -1582.721437

The number of imaginary frequencies: 1

The imaginary frequency= -115.57

RC2

| Center<br>Number | Atomic<br>Number | Atomic<br>Type | Coordinates (Angstroms) |           |          |
|------------------|------------------|----------------|-------------------------|-----------|----------|
|                  |                  |                | X                       | Y         | Z        |
| 1                | 6                | 0              | 5.357115                | -0.714942 | 0.235496 |
| 2                | 6                | 0              | 4.981785                | -2.057284 | 0.137813 |
| 3                | 6                | 0              | 3.637482                | -2.406790 | 0.058870 |
| 4                | 6                | 0              | 2.670931                | -1.408800 | 0.076822 |
| 5                | 6                | 0              | 3.034018                | -0.050194 | 0.155747 |

---

|    |    |   |           |           |           |
|----|----|---|-----------|-----------|-----------|
| 6  | 6  | 0 | 4.396793  | 0.283648  | 0.238162  |
| 7  | 6  | 0 | -1.216225 | -0.809619 | -1.116715 |
| 8  | 6  | 0 | 0.110844  | -0.549465 | -0.510269 |
| 9  | 6  | 0 | 0.655311  | 0.709808  | -0.314742 |
| 10 | 6  | 0 | 2.014225  | 0.951060  | 0.041390  |
| 11 | 1  | 0 | 6.407364  | -0.449635 | 0.298934  |
| 12 | 1  | 0 | 5.739273  | -2.834277 | 0.124811  |
| 13 | 1  | 0 | 4.687390  | 1.327412  | 0.287579  |
| 14 | 8  | 0 | 2.329765  | 2.236909  | 0.145921  |
| 15 | 6  | 0 | 0.076969  | 2.021451  | -0.417659 |
| 16 | 6  | 0 | -1.238243 | 2.470209  | -0.351222 |
| 17 | 6  | 0 | 1.203229  | 2.999250  | -0.372447 |
| 18 | 6  | 0 | -1.477627 | 3.795777  | -0.008330 |
| 19 | 1  | 0 | -2.068967 | 1.779896  | -0.450249 |
| 20 | 6  | 0 | 0.892591  | 4.277809  | 0.320739  |
| 21 | 6  | 0 | -0.403996 | 4.664625  | 0.388763  |
| 22 | 1  | 0 | -2.499051 | 4.151862  | 0.073510  |
| 23 | 1  | 0 | 1.711442  | 4.922588  | 0.622329  |
| 24 | 1  | 0 | -0.652971 | 5.644751  | 0.784271  |
| 25 | 8  | 0 | -2.246065 | -0.767893 | -0.090203 |
| 26 | 6  | 0 | -3.491537 | -0.922702 | -0.540054 |
| 27 | 8  | 0 | -3.809716 | -1.094735 | -1.696469 |
| 28 | 8  | 0 | -4.317974 | -0.852683 | 0.497282  |
| 29 | 6  | 0 | -5.719846 | -0.995341 | 0.188068  |
| 30 | 1  | 0 | -5.877280 | -1.962260 | -0.298246 |
| 31 | 1  | 0 | -6.008544 | -0.204602 | -0.510401 |
| 32 | 6  | 0 | -6.480301 | -0.894920 | 1.489934  |
| 33 | 1  | 0 | -7.551359 | -0.999028 | 1.289814  |
| 34 | 1  | 0 | -6.179105 | -1.688138 | 2.181212  |
| 35 | 1  | 0 | -6.310790 | 0.074441  | 1.968968  |
| 36 | 1  | 0 | 3.341296  | -3.448397 | -0.014581 |
| 37 | 1  | 0 | -1.445099 | -0.051827 | -1.871285 |
| 38 | 1  | 0 | -1.244631 | -1.793108 | -1.591952 |
| 39 | 16 | 0 | 0.961632  | -1.911464 | 0.154324  |
| 40 | 8  | 0 | 0.768824  | -3.085684 | -0.708890 |
| 41 | 8  | 0 | 0.652678  | -2.100727 | 1.581615  |
| 42 | 1  | 0 | 1.523720  | 3.250752  | -1.400140 |

-----  
Sum of electronic and zero-point Energies= -1582.68988

Sum of electronic and thermal Free Energies= -1582.74376

The number of imaginary frequencies: 0

---

TS2

---

| Center<br>Number | Atomic<br>Number | Atomic<br>Type | Coordinates (Angstroms) |           |           |
|------------------|------------------|----------------|-------------------------|-----------|-----------|
|                  |                  |                | X                       | Y         | Z         |
| 1                | 6                | 0              | 5.498300                | -0.022572 | -0.021647 |
| 2                | 6                | 0              | 5.337125                | -1.407795 | -0.018431 |
| 3                | 6                | 0              | 4.064468                | -1.973830 | 0.027802  |
| 4                | 6                | 0              | 2.955335                | -1.143677 | 0.063239  |
| 5                | 6                | 0              | 3.103387                | 0.256468  | 0.041731  |
| 6                | 6                | 0              | 4.389230                | 0.811154  | 0.004588  |
| 7                | 6                | 0              | -0.767622               | -1.273171 | -1.238396 |
| 8                | 6                | 0              | 0.305855                | -0.769034 | -0.557861 |
| 9                | 6                | 0              | 0.619706                | 0.629403  | -0.344242 |
| 10               | 6                | 0              | 1.921437                | 1.080150  | -0.035997 |
| 11               | 1                | 0              | 6.493299                | 0.408084  | -0.054277 |
| 12               | 1                | 0              | 6.208053                | -2.054410 | -0.048387 |
| 13               | 1                | 0              | 4.510283                | 1.888640  | -0.023006 |
| 14               | 8                | 0              | 2.021023                | 2.385410  | 0.117709  |
| 15               | 6                | 0              | -0.157467               | 1.781172  | -0.395561 |
| 16               | 6                | 0              | -1.557045               | 2.020550  | -0.453890 |
| 17               | 6                | 0              | 0.751633                | 2.942414  | -0.249769 |
| 18               | 6                | 0              | -1.996514               | 3.218628  | 0.029538  |
| 19               | 1                | 0              | -2.253086               | 1.243768  | -0.762751 |
| 20               | 6                | 0              | 0.226582                | 4.090204  | 0.534962  |
| 21               | 6                | 0              | -1.110860               | 4.230615  | 0.578946  |
| 22               | 1                | 0              | -3.065005               | 3.407576  | 0.072050  |
| 23               | 1                | 0              | 0.918545                | 4.839828  | 0.902584  |
| 24               | 1                | 0              | -1.554223               | 5.107368  | 1.038388  |
| 25               | 8                | 0              | -2.368094               | -1.580702 | -0.017242 |
| 26               | 6                | 0              | -3.434997               | -1.027284 | -0.422352 |
| 27               | 8                | 0              | -3.593665               | -0.277036 | -1.398276 |
| 28               | 8                | 0              | -4.505731               | -1.339651 | 0.373412  |
| 29               | 6                | 0              | -5.750671               | -0.739063 | 0.020858  |
| 30               | 1                | 0              | -6.035042               | -1.039268 | -0.993925 |
| 31               | 1                | 0              | -5.651248               | 0.352386  | 0.025869  |
| 32               | 6                | 0              | -6.782628               | -1.195771 | 1.031536  |
| 33               | 1                | 0              | -7.756231               | -0.753683 | 0.794568  |
| 34               | 1                | 0              | -6.886762               | -2.285854 | 1.017846  |
| 35               | 1                | 0              | -6.501099               | -0.887067 | 2.043858  |
| 36               | 1                | 0              | 3.936742                | -3.051299 | 0.038693  |
| 37               | 1                | 0              | -1.363946               | -0.625960 | -1.871625 |
| 38               | 1                | 0              | -0.789712               | -2.331017 | -1.467762 |
| 39               | 16               | 0              | 1.339238                | -1.875613 | 0.308262  |

S22

|    |   |   |          |           |           |
|----|---|---|----------|-----------|-----------|
| 40 | 8 | 0 | 1.317314 | -3.197126 | -0.326167 |
| 41 | 8 | 0 | 1.097748 | -1.816772 | 1.757199  |
| 42 | 1 | 0 | 0.921351 | 3.346348  | -1.267734 |

-----  
Sum of electronic and zero-point Energies= -1582.677683

Sum of electronic and thermal Free Energies= -1582.730591

The number of imaginary frequencies: 1

The imaginary frequency= -203.00

PC2

| Center<br>Number | Atomic<br>Number | Atomic<br>Type | Coordinates (Angstroms) |           |           |
|------------------|------------------|----------------|-------------------------|-----------|-----------|
|                  |                  |                | X                       | Y         | Z         |
| 1                | 6                | 0              | 2.979211                | 2.759445  | -0.235455 |
| 2                | 6                | 0              | 3.899809                | 1.721366  | -0.124478 |
| 3                | 6                | 0              | 3.469082                | 0.401064  | 0.016375  |
| 4                | 6                | 0              | 2.110946                | 0.137018  | 0.035924  |
| 5                | 6                | 0              | 1.167888                | 1.175818  | -0.087861 |
| 6                | 6                | 0              | 1.614824                | 2.493187  | -0.220915 |
| 7                | 6                | 0              | -0.245356               | -2.728547 | -1.189352 |
| 8                | 6                | 0              | 0.037771                | -1.622533 | -0.505351 |
| 9                | 6                | 0              | -0.787814               | -0.426660 | -0.357732 |
| 10               | 6                | 0              | -0.238829               | 0.846718  | -0.149071 |
| 11               | 1                | 0              | 3.323830                | 3.782143  | -0.342430 |
| 12               | 1                | 0              | 4.963312                | 1.934293  | -0.146532 |
| 13               | 1                | 0              | 0.896317                | 3.298302  | -0.330167 |
| 14               | 8                | 0              | -1.138900               | 1.802219  | -0.046600 |
| 15               | 6                | 0              | -2.167731               | -0.251831 | -0.363183 |
| 16               | 6                | 0              | -3.274844               | -1.126302 | -0.295773 |
| 17               | 6                | 0              | -2.412775               | 1.208227  | -0.324729 |
| 18               | 6                | 0              | -4.448174               | -0.601392 | 0.175132  |
| 19               | 1                | 0              | -3.159907               | -2.189546 | -0.468652 |
| 20               | 6                | 0              | -3.600702               | 1.668884  | 0.434067  |
| 21               | 6                | 0              | -4.602774               | 0.780229  | 0.580009  |
| 22               | 1                | 0              | -5.295038               | -1.265005 | 0.320220  |
| 23               | 1                | 0              | -3.684946               | 2.716475  | 0.700908  |
| 24               | 1                | 0              | -5.543898               | 1.083225  | 1.024765  |
| 25               | 1                | 0              | 4.186752                | -0.407401 | 0.108726  |
| 26               | 1                | 0              | -1.187331               | -2.831553 | -1.719480 |
| 27               | 1                | 0              | 0.459906                | -3.552349 | -1.240245 |
| 28               | 16               | 0              | 1.578152                | -1.532558 | 0.393310  |
| 29               | 8                | 0              | 2.542171                | -2.471691 | -0.171461 |

|    |   |   |           |           |           |
|----|---|---|-----------|-----------|-----------|
| 30 | 8 | 0 | 1.274607  | -1.599902 | 1.824022  |
| 31 | 1 | 0 | -2.635638 | 1.499183  | -1.373402 |

Sum of electronic and zero-point Energies= -1239.600553

Sum of electronic and thermal Free Energies= -1239.642401

The number of imaginary frequencies: 0

| Center<br>Number | Atomic<br>Number | Atomic<br>Type | Coordinates (Angstroms) |           |           |
|------------------|------------------|----------------|-------------------------|-----------|-----------|
|                  |                  |                | X                       | Y         | Z         |
| 1                | 6                | 0              | 1.186013                | -0.019479 | -0.000414 |
| 2                | 8                | 0              | 1.323416                | 1.218744  | 0.000121  |
| 3                | 8                | 0              | 2.028414                | -0.932140 | 0.000355  |
| 4                | 8                | 0              | -0.144466               | -0.511604 | -0.000324 |
| 5                | 6                | 0              | -1.172374               | 0.455438  | -0.000229 |
| 6                | 6                | 0              | -2.503908               | -0.274944 | 0.000338  |
| 7                | 1                | 0              | -1.093636               | 1.107560  | -0.881140 |
| 8                | 1                | 0              | -1.093105               | 1.108003  | 0.880298  |
| 9                | 1                | 0              | -3.334142               | 0.440447  | 0.000381  |
| 10               | 1                | 0              | -2.598455               | -0.911289 | -0.886789 |
| 11               | 1                | 0              | -2.597951               | -0.910821 | 0.887855  |

Sum of electronic and zero-point Energies= -343.077643

Sum of electronic and thermal Free Energies= -343.108321

The number of imaginary frequencies: 0

RC3

| Center<br>Number | Atomic<br>Number | Atomic<br>Type | Coordinates (Angstroms) |           |           |
|------------------|------------------|----------------|-------------------------|-----------|-----------|
|                  |                  |                | X                       | Y         | Z         |
| 1                | 6                | 0              | -5.670858               | 0.612068  | 0.019248  |
| 2                | 6                | 0              | -5.714288               | -0.711488 | -0.412851 |
| 3                | 6                | 0              | -4.534743               | -1.428915 | -0.592354 |
| 4                | 6                | 0              | -3.310622               | -0.813237 | -0.339367 |
| 5                | 6                | 0              | -3.249327               | 0.522493  | 0.076414  |
| 6                | 6                | 0              | -4.444552               | 1.221784  | 0.256477  |
| 7                | 6                | 0              | 0.429690                | -1.792516 | 0.953509  |
| 8                | 6                | 0              | -0.739754               | -0.993304 | 0.502703  |
| 9                | 6                | 0              | -0.730346               | 0.496073  | 0.397156  |
| 10               | 6                | 0              | -1.952561               | 1.245299  | 0.261623  |
| 11               | 1                | 0              | -6.590729               | 1.169508  | 0.164929  |
| 12               | 1                | 0              | -6.667347               | -1.193776 | -0.607014 |

S24



|    |    |   |           |           |           |
|----|----|---|-----------|-----------|-----------|
| 13 | 1  | 0 | -4.393103 | 2.257509  | 0.575822  |
| 14 | 8  | 0 | -1.942162 | 2.488465  | 0.277383  |
| 15 | 16 | 0 | -1.832037 | -1.778946 | -0.581347 |
| 16 | 6  | 0 | 0.549655  | 1.216277  | 0.261387  |
| 17 | 6  | 0 | 0.837266  | 1.909179  | -0.924774 |
| 18 | 6  | 0 | 1.499953  | 1.212532  | 1.292253  |
| 19 | 6  | 0 | 2.059530  | 2.550553  | -1.087266 |
| 20 | 1  | 0 | 0.106263  | 1.919953  | -1.727374 |
| 21 | 6  | 0 | 2.713783  | 1.873687  | 1.133485  |
| 22 | 1  | 0 | 1.280260  | 0.714252  | 2.230815  |
| 23 | 6  | 0 | 3.002029  | 2.533346  | -0.059427 |
| 24 | 1  | 0 | 2.276599  | 3.067004  | -2.017595 |
| 25 | 1  | 0 | 3.435731  | 1.869552  | 1.944534  |
| 26 | 1  | 0 | 3.955648  | 3.037314  | -0.186450 |
| 27 | 8  | 0 | 1.487663  | -1.696867 | -0.036492 |
| 28 | 6  | 0 | 2.726916  | -1.520463 | 0.425987  |
| 29 | 8  | 0 | 3.084459  | -1.650011 | 1.575909  |
| 30 | 8  | 0 | 3.498334  | -1.187269 | -0.600687 |
| 31 | 6  | 0 | 4.874635  | -0.900254 | -0.283065 |
| 32 | 1  | 0 | 5.360714  | -1.823464 | 0.046738  |
| 33 | 1  | 0 | 4.903081  | -0.179634 | 0.538666  |
| 34 | 6  | 0 | 5.514541  | -0.342631 | -1.533004 |
| 35 | 1  | 0 | 6.564924  | -0.112027 | -1.329346 |
| 36 | 1  | 0 | 5.471877  | -1.065687 | -2.353538 |
| 37 | 1  | 0 | 5.011694  | 0.577609  | -1.847111 |
| 38 | 1  | 0 | -4.571289 | -2.464154 | -0.918896 |
| 39 | 1  | 0 | 0.811849  | -1.440435 | 1.913355  |
| 40 | 1  | 0 | 0.164386  | -2.847833 | 1.056326  |

Sum of electronic and zero-point Energies= -1432.316977

Sum of electronic and thermal Free Energies= -1432.369815

The number of imaginary frequencies: 0

TS3

| Center<br>Number | Atomic<br>Number | Atomic<br>Type | Coordinates (Angstroms) |           |          |
|------------------|------------------|----------------|-------------------------|-----------|----------|
|                  |                  |                | X                       | Y         | Z        |
| 1                | 6                | 0              | 5.488476                | 0.627937  | 0.450332 |
| 2                | 6                | 0              | 5.673072                | -0.740310 | 0.266860 |
| 3                | 6                | 0              | 4.570852                | -1.567949 | 0.065120 |
| 4                | 6                | 0              | 3.284449                | -1.033076 | 0.052807 |
| 5                | 6                | 0              | 3.082102                | 0.349640  | 0.231536 |
| 6                | 6                | 0              | 4.207485                | 1.164720  | 0.427845 |

S25

---

|    |    |   |           |           |           |
|----|----|---|-----------|-----------|-----------|
| 7  | 6  | 0 | -0.694175 | -1.921659 | -0.774600 |
| 8  | 6  | 0 | 0.546419  | -1.167849 | -0.416090 |
| 9  | 6  | 0 | 0.594990  | 0.213548  | -0.167052 |
| 10 | 6  | 0 | 1.748572  | 0.935907  | 0.187170  |
| 11 | 1  | 0 | 6.343002  | 1.278798  | 0.608460  |
| 12 | 1  | 0 | 6.670457  | -1.168635 | 0.278179  |
| 13 | 1  | 0 | 4.057148  | 2.230573  | 0.562941  |
| 14 | 8  | 0 | 1.631424  | 2.235102  | 0.400441  |
| 15 | 16 | 0 | 1.944341  | -2.186388 | -0.122873 |
| 16 | 6  | 0 | -0.513390 | 1.156716  | -0.271099 |
| 17 | 6  | 0 | -0.353165 | 2.272696  | 0.620660  |
| 18 | 6  | 0 | -1.478360 | 1.220546  | -1.279745 |
| 19 | 6  | 0 | -1.071004 | 3.475581  | 0.377122  |
| 20 | 1  | 0 | -0.063418 | 2.071284  | 1.648078  |
| 21 | 6  | 0 | -2.205944 | 2.388492  | -1.462587 |
| 22 | 1  | 0 | -1.609831 | 0.400580  | -1.975964 |
| 23 | 6  | 0 | -1.980063 | 3.524280  | -0.652405 |
| 24 | 1  | 0 | -0.941151 | 4.317114  | 1.049598  |
| 25 | 1  | 0 | -2.929851 | 2.444507  | -2.269639 |
| 26 | 1  | 0 | -2.558282 | 4.426355  | -0.827438 |
| 27 | 8  | 0 | -1.707538 | -1.666470 | 0.221696  |
| 28 | 6  | 0 | -2.956934 | -1.509176 | -0.219356 |
| 29 | 8  | 0 | -3.335746 | -1.650763 | -1.361656 |
| 30 | 8  | 0 | -3.712295 | -1.169437 | 0.816525  |
| 31 | 6  | 0 | -5.104520 | -0.930147 | 0.520586  |
| 32 | 1  | 0 | -5.537602 | -1.842390 | 0.100659  |
| 33 | 1  | 0 | -5.171114 | -0.136216 | -0.228820 |
| 34 | 6  | 0 | -5.777183 | -0.534664 | 1.814322  |
| 35 | 1  | 0 | -6.838119 | -0.344386 | 1.624233  |
| 36 | 1  | 0 | -5.697173 | -1.333728 | 2.557912  |
| 37 | 1  | 0 | -5.330712 | 0.376321  | 2.224887  |
| 38 | 1  | 0 | 4.715617  | -2.635112 | -0.080764 |
| 39 | 1  | 0 | -1.085127 | -1.641609 | -1.755854 |
| 40 | 1  | 0 | -0.510117 | -3.000092 | -0.795090 |

-----  
Sum of electronic and zero-point Energies= -1432.291033

Sum of electronic and thermal Free Energies= -1432.344645

The number of imaginary frequencies: 1

The imaginary frequency= -271.21

PC3

-----  

| Center<br>Number | Atomic<br>Number | Atomic<br>Type | Coordinates (Angstroms) |   |   |
|------------------|------------------|----------------|-------------------------|---|---|
|                  |                  |                | X                       | Y | Z |

---



---

|    |    |   |           |           |           |
|----|----|---|-----------|-----------|-----------|
| 1  | 6  | 0 | 5.422788  | -0.177121 | 0.741565  |
| 2  | 6  | 0 | 5.403702  | -1.526424 | 0.389585  |
| 3  | 6  | 0 | 4.208866  | -2.125251 | -0.005314 |
| 4  | 6  | 0 | 3.032214  | -1.383162 | -0.047087 |
| 5  | 6  | 0 | 3.037048  | -0.013995 | 0.305847  |
| 6  | 6  | 0 | 4.255435  | 0.570847  | 0.699381  |
| 7  | 6  | 0 | -1.006615 | -1.483414 | -1.116222 |
| 8  | 6  | 0 | 0.323556  | -1.007419 | -0.637651 |
| 9  | 6  | 0 | 0.572168  | 0.297679  | -0.213217 |
| 10 | 6  | 0 | 1.827373  | 0.743716  | 0.246418  |
| 11 | 1  | 0 | 6.351764  | 0.293271  | 1.049022  |
| 12 | 1  | 0 | 6.314375  | -2.116152 | 0.419108  |
| 13 | 1  | 0 | 4.266669  | 1.621210  | 0.970488  |
| 14 | 8  | 0 | 1.844949  | 2.066502  | 0.566623  |
| 15 | 16 | 0 | 1.556739  | -2.253198 | -0.527410 |
| 16 | 6  | 0 | -0.283596 | 1.456061  | -0.197592 |
| 17 | 6  | 0 | 0.471962  | 2.501845  | 0.577282  |
| 18 | 6  | 0 | -1.488278 | 1.790073  | -0.800818 |
| 19 | 6  | 0 | 0.247727  | 3.895268  | 0.097563  |
| 20 | 1  | 0 | 0.154820  | 2.448617  | 1.638540  |
| 21 | 6  | 0 | -1.836842 | 3.136605  | -0.913261 |
| 22 | 1  | 0 | -2.123710 | 1.044341  | -1.266809 |
| 23 | 6  | 0 | -0.916625 | 4.173479  | -0.538998 |
| 24 | 1  | 0 | 0.959186  | 4.666099  | 0.376672  |
| 25 | 1  | 0 | -2.768934 | 3.408235  | -1.398077 |
| 26 | 1  | 0 | -1.157535 | 5.199025  | -0.804466 |
| 27 | 8  | 0 | -1.938769 | -1.418976 | -0.014132 |
| 28 | 6  | 0 | -3.223235 | -1.268994 | -0.341992 |
| 29 | 8  | 0 | -3.663310 | -1.184651 | -1.468403 |
| 30 | 8  | 0 | -3.928860 | -1.222009 | 0.779197  |
| 31 | 6  | 0 | -5.352523 | -1.044819 | 0.614403  |
| 32 | 1  | 0 | -5.742493 | -1.873144 | 0.016316  |
| 33 | 1  | 0 | -5.529169 | -0.111016 | 0.073269  |
| 34 | 6  | 0 | -5.964333 | -1.014764 | 1.995413  |
| 35 | 1  | 0 | -7.046805 | -0.880351 | 1.905339  |
| 36 | 1  | 0 | -5.775435 | -1.951868 | 2.528199  |
| 37 | 1  | 0 | -5.560933 | -0.185342 | 2.584546  |
| 38 | 1  | 0 | 4.197308  | -3.176202 | -0.281675 |
| 39 | 1  | 0 | -1.377031 | -0.866190 | -1.938452 |
| 40 | 1  | 0 | -0.966735 | -2.517558 | -1.471563 |

---

Sum of electronic and zero-point Energies= -1432.370107

Sum of electronic and thermal Free Energies= -1432.316729

---

The number of imaginary frequencies: 0

TS-PPG(S<sub>0</sub>) in MeCN

---

| Center<br>Number | Atomic<br>Number | Atomic<br>Type | Coordinates (Angstroms) |           |           |
|------------------|------------------|----------------|-------------------------|-----------|-----------|
|                  |                  |                | X                       | Y         | Z         |
| 1                | 6                | 0              | -5.320533               | 1.584642  | -0.241996 |
| 2                | 6                | 0              | -5.661444               | 0.242803  | -0.083710 |
| 3                | 6                | 0              | -4.666040               | -0.724279 | 0.008719  |
| 4                | 6                | 0              | -3.334884               | -0.327619 | -0.059573 |
| 5                | 6                | 0              | -2.969859               | 1.011369  | -0.212091 |
| 6                | 6                | 0              | -3.986214               | 1.965885  | -0.301546 |
| 7                | 6                | 0              | 0.542664                | -1.772510 | 0.483947  |
| 8                | 6                | 0              | -0.569390               | -0.781092 | 0.211058  |
| 9                | 6                | 0              | -0.425814               | 0.548764  | 0.104954  |
| 10               | 6                | 0              | -1.555299               | 1.483862  | -0.234466 |
| 11               | 1                | 0              | -6.098658               | 2.337542  | -0.313055 |
| 12               | 1                | 0              | -6.703419               | -0.054549 | -0.029309 |
| 13               | 1                | 0              | -3.712072               | 3.009252  | -0.410628 |
| 14               | 8                | 0              | -1.306041               | 2.647951  | -0.487530 |
| 15               | 6                | 0              | 0.898096                | 1.198630  | 0.323595  |
| 16               | 6                | 0              | 1.576905                | 1.799586  | -0.740781 |
| 17               | 6                | 0              | 1.467868                | 1.202973  | 1.597598  |
| 18               | 6                | 0              | 2.820575                | 2.383546  | -0.531727 |
| 19               | 1                | 0              | 1.136866                | 1.793642  | -1.732895 |
| 20               | 6                | 0              | 2.712063                | 1.795288  | 1.805008  |
| 21               | 1                | 0              | 0.939066                | 0.740187  | 2.426056  |
| 22               | 6                | 0              | 3.391225                | 2.382751  | 0.741431  |
| 23               | 1                | 0              | 3.346627                | 2.841095  | -1.364394 |
| 24               | 1                | 0              | 3.149422                | 1.792102  | 2.798842  |
| 25               | 1                | 0              | 4.363008                | 2.840595  | 0.901801  |
| 26               | 8                | 0              | 1.621070                | -1.516552 | -0.409793 |
| 27               | 6                | 0              | 2.842305                | -1.432666 | 0.138924  |
| 28               | 8                | 0              | 3.121815                | -1.693863 | 1.286209  |
| 29               | 8                | 0              | 3.676678                | -1.032785 | -0.805359 |
| 30               | 6                | 0              | 5.040551                | -0.819343 | -0.383292 |
| 31               | 1                | 0              | 5.474783                | -1.783100 | -0.101611 |
| 32               | 1                | 0              | 5.036413                | -0.167379 | 0.494113  |
| 33               | 6                | 0              | 5.773887                | -0.188130 | -1.542897 |
| 34               | 1                | 0              | 6.816605                | -0.016051 | -1.258232 |
| 35               | 1                | 0              | 5.758299                | -0.841093 | -2.421038 |
| 36               | 1                | 0              | 5.323914                | 0.773521  | -1.808962 |
| 37               | 1                | 0              | -4.925828               | -1.770653 | 0.134286  |

---

|    |    |   |           |           |           |
|----|----|---|-----------|-----------|-----------|
| 38 | 1  | 0 | 0.878255  | -1.687236 | 1.519741  |
| 39 | 1  | 0 | 0.208388  | -2.800270 | 0.323101  |
| 40 | 16 | 0 | -2.120561 | -1.614012 | -0.035935 |
| 41 | 8  | 0 | -2.356647 | -2.463012 | 1.132905  |
| 42 | 8  | 0 | -2.072210 | -2.255510 | -1.351655 |

Sum of electronic and zero-point Energies= -1582.436956

Sum of electronic and thermal Free Energies= -1582.491683

The number of imaginary frequencies: 0

TS-PPG(S<sub>0</sub>) in MeOH

| Center<br>Number | Atomic<br>Number | Atomic<br>Type | Coordinates (Angstroms) |           |           |
|------------------|------------------|----------------|-------------------------|-----------|-----------|
|                  |                  |                | X                       | Y         | Z         |
| 1                | 6                | 0              | -5.319626               | 1.604307  | -0.199347 |
| 2                | 6                | 0              | -5.665080               | 0.261054  | -0.071086 |
| 3                | 6                | 0              | -4.673396               | -0.712074 | -0.000627 |
| 4                | 6                | 0              | -3.342412               | -0.316376 | -0.061160 |
| 5                | 6                | 0              | -2.971146               | 1.024510  | -0.184300 |
| 6                | 6                | 0              | -3.984240               | 1.983668  | -0.251520 |
| 7                | 6                | 0              | 0.529106                | -1.798058 | 0.427009  |
| 8                | 6                | 0              | -0.574647               | -0.790111 | 0.183015  |
| 9                | 6                | 0              | -0.427228               | 0.540877  | 0.102887  |
| 10               | 6                | 0              | -1.556672               | 1.487847  | -0.197818 |
| 11               | 1                | 0              | -6.095286               | 2.361254  | -0.252551 |
| 12               | 1                | 0              | -6.708005               | -0.033954 | -0.022416 |
| 13               | 1                | 0              | -3.709835               | 3.029288  | -0.336419 |
| 14               | 8                | 0              | -1.300659               | 2.660078  | -0.414046 |
| 15               | 6                | 0              | 0.903660                | 1.178604  | 0.310925  |
| 16               | 6                | 0              | 1.569082                | 1.785360  | -0.758768 |
| 17               | 6                | 0              | 1.495304                | 1.157369  | 1.574746  |
| 18               | 6                | 0              | 2.824305                | 2.349604  | -0.564724 |
| 19               | 1                | 0              | 1.110703                | 1.797357  | -1.742851 |
| 20               | 6                | 0              | 2.751840                | 1.728720  | 1.765549  |
| 21               | 1                | 0              | 0.975955                | 0.689409  | 2.406313  |
| 22               | 6                | 0              | 3.418508                | 2.321896  | 0.697099  |
| 23               | 1                | 0              | 3.340899                | 2.811873  | -1.400661 |
| 24               | 1                | 0              | 3.208640                | 1.704843  | 2.750344  |
| 25               | 1                | 0              | 4.400079                | 2.762766  | 0.845054  |
| 26               | 8                | 0              | 1.627089                | -1.501560 | -0.431615 |
| 27               | 6                | 0              | 2.836493                | -1.421340 | 0.137352  |
| 28               | 8                | 0              | 3.102808                | -1.717815 | 1.282289  |
| 29               | 8                | 0              | 3.678888                | -0.973503 | -0.774471 |

|    |    |   |           |           |           |
|----|----|---|-----------|-----------|-----------|
| 30 | 6  | 0 | 5.048310  | -0.793682 | -0.339546 |
| 31 | 1  | 0 | 5.460988  | -1.774746 | -0.088657 |
| 32 | 1  | 0 | 5.046507  | -0.168184 | 0.556805  |
| 33 | 6  | 0 | 5.791774  | -0.139279 | -1.478388 |
| 34 | 1  | 0 | 6.835958  | 0.009002  | -1.185832 |
| 35 | 1  | 0 | 5.769161  | -0.766593 | -2.374946 |
| 36 | 1  | 0 | 5.356776  | 0.836438  | -1.717011 |
| 37 | 1  | 0 | -4.937298 | -1.760011 | 0.102863  |
| 38 | 1  | 0 | 0.841163  | -1.767198 | 1.473122  |
| 39 | 1  | 0 | 0.199620  | -2.814770 | 0.201725  |
| 40 | 16 | 0 | -2.134178 | -1.603963 | -0.056476 |
| 41 | 8  | 0 | -2.366402 | -2.467782 | 1.105398  |
| 42 | 8  | 0 | -2.100821 | -2.245763 | -1.374937 |

Sum of electronic and zero-point Energies= -1582.435916

Sum of electronic and thermal Free Energies= -1582.490095

The number of imaginary frequencies: 0

TS-PPG(S<sub>0</sub>) in H<sub>2</sub>O

| Center<br>Number | Atomic<br>Number | Atomic<br>Type | Coordinates (Angstroms) |           |           |
|------------------|------------------|----------------|-------------------------|-----------|-----------|
|                  |                  |                | X                       | Y         | Z         |
| 1                | 6                | 0              | -5.307609               | 1.621125  | -0.234238 |
| 2                | 6                | 0              | -5.659713               | 0.279124  | -0.112599 |
| 3                | 6                | 0              | -4.672640               | -0.697427 | -0.027820 |
| 4                | 6                | 0              | -3.339445               | -0.306766 | -0.067546 |
| 5                | 6                | 0              | -2.961519               | 1.032946  | -0.184171 |
| 6                | 6                | 0              | -3.970273               | 1.995472  | -0.265793 |
| 7                | 6                | 0              | 0.525608                | -1.800569 | 0.451916  |
| 8                | 6                | 0              | -0.576426               | -0.791678 | 0.204458  |
| 9                | 6                | 0              | -0.422666               | 0.538586  | 0.123965  |
| 10               | 6                | 0              | -1.545996               | 1.491676  | -0.178193 |
| 11               | 1                | 0              | -6.079237               | 2.380652  | -0.298789 |
| 12               | 1                | 0              | -6.703827               | -0.012268 | -0.080452 |
| 13               | 1                | 0              | -3.691218               | 3.039782  | -0.346001 |
| 14               | 8                | 0              | -1.283616               | 2.665866  | -0.381461 |
| 15               | 6                | 0              | 0.912160                | 1.167678  | 0.332144  |
| 16               | 6                | 0              | 1.580605                | 1.769286  | -0.738533 |
| 17               | 6                | 0              | 1.505239                | 1.142237  | 1.595167  |
| 18               | 6                | 0              | 2.840286                | 2.324215  | -0.546539 |
| 19               | 1                | 0              | 1.120498                | 1.784368  | -1.721444 |
| 20               | 6                | 0              | 2.766287                | 1.704147  | 1.783918  |
| 21               | 1                | 0              | 0.983568                | 0.677078  | 2.426450  |

|    |    |   |           |           |           |
|----|----|---|-----------|-----------|-----------|
| 22 | 6  | 0 | 3.436150  | 2.291691  | 0.714336  |
| 23 | 1  | 0 | 3.360033  | 2.780688  | -1.383223 |
| 24 | 1  | 0 | 3.224282  | 1.676966  | 2.767604  |
| 25 | 1  | 0 | 4.421544  | 2.723476  | 0.860323  |
| 26 | 8  | 0 | 1.610978  | -1.525784 | -0.431166 |
| 27 | 6  | 0 | 2.830159  | -1.437325 | 0.120205  |
| 28 | 8  | 0 | 3.114769  | -1.729690 | 1.262357  |
| 29 | 8  | 0 | 3.656922  | -0.987073 | -0.806081 |
| 30 | 6  | 0 | 5.028147  | -0.781280 | -0.385672 |
| 31 | 1  | 0 | 5.468415  | -1.756572 | -0.162885 |
| 32 | 1  | 0 | 5.022007  | -0.175804 | 0.523767  |
| 33 | 6  | 0 | 5.738624  | -0.081133 | -1.518071 |
| 34 | 1  | 0 | 6.782352  | 0.085318  | -1.235664 |
| 35 | 1  | 0 | 5.718754  | -0.686134 | -2.429336 |
| 36 | 1  | 0 | 5.276174  | 0.888984  | -1.724829 |
| 37 | 1  | 0 | -4.942147 | -1.744048 | 0.070310  |
| 38 | 1  | 0 | 0.855282  | -1.747247 | 1.491223  |
| 39 | 1  | 0 | 0.188323  | -2.820034 | 0.255288  |
| 40 | 16 | 0 | -2.137405 | -1.599737 | -0.042707 |
| 41 | 8  | 0 | -2.384926 | -2.456302 | 1.122069  |
| 42 | 8  | 0 | -2.095148 | -2.250945 | -1.357047 |

Sum of electronic and zero-point Energies= -1582.431269

Sum of electronic and thermal Free Energies= -1582.484885

The number of imaginary frequencies: 0

TS-PPG(S<sub>0</sub>) with 1H<sub>2</sub>O

| Center<br>Number | Atomic<br>Number | Atomic<br>Type | Coordinates (Angstroms) |           |           |
|------------------|------------------|----------------|-------------------------|-----------|-----------|
|                  |                  |                | X                       | Y         | Z         |
| 1                | 6                | 0              | 5.223177                | 1.433381  | 0.956783  |
| 2                | 6                | 0              | 5.590382                | 0.169904  | 0.500889  |
| 3                | 6                | 0              | 4.624112                | -0.708577 | 0.020478  |
| 4                | 6                | 0              | 3.295982                | -0.300515 | 0.005738  |
| 5                | 6                | 0              | 2.904338                | 0.964543  | 0.453055  |
| 6                | 6                | 0              | 3.891739                | 1.829364  | 0.929144  |
| 7                | 6                | 0              | -0.487804               | -1.415924 | -1.398164 |
| 8                | 6                | 0              | 0.607539                | -0.576164 | -0.778275 |
| 9                | 6                | 0              | 0.440607                | 0.674928  | -0.326625 |
| 10               | 6                | 0              | 1.501160                | 1.453566  | 0.400199  |
| 11               | 1                | 0              | 5.978615                | 2.116536  | 1.329537  |
| 12               | 1                | 0              | 6.630651                | -0.136222 | 0.515158  |
| 13               | 1                | 0              | 3.602332                | 2.817742  | 1.267432  |

|    |    |   |           |           |           |
|----|----|---|-----------|-----------|-----------|
| 14 | 8  | 0 | 1.195860  | 2.513760  | 0.920940  |
| 15 | 6  | 0 | -0.863204 | 1.374335  | -0.503168 |
| 16 | 6  | 0 | -1.738514 | 1.500461  | 0.578871  |
| 17 | 6  | 0 | -1.215464 | 1.890201  | -1.751184 |
| 18 | 6  | 0 | -2.966748 | 2.130511  | 0.404679  |
| 19 | 1  | 0 | -1.470434 | 1.074242  | 1.540265  |
| 20 | 6  | 0 | -2.444577 | 2.522610  | -1.918359 |
| 21 | 1  | 0 | -0.530840 | 1.789895  | -2.588287 |
| 22 | 6  | 0 | -3.321649 | 2.641004  | -0.842987 |
| 23 | 1  | 0 | -3.650179 | 2.215463  | 1.244276  |
| 24 | 1  | 0 | -2.717025 | 2.918925  | -2.891479 |
| 25 | 1  | 0 | -4.282011 | 3.129448  | -0.976438 |
| 26 | 8  | 0 | -1.443511 | -1.711658 | -0.375204 |
| 27 | 6  | 0 | -2.699572 | -1.285045 | -0.559996 |
| 28 | 8  | 0 | -3.172245 | -0.879047 | -1.598157 |
| 29 | 8  | 0 | -3.329083 | -1.407284 | 0.598671  |
| 30 | 6  | 0 | -4.702662 | -0.946818 | 0.648069  |
| 31 | 1  | 0 | -5.326732 | -1.700133 | 0.161252  |
| 32 | 1  | 0 | -4.773368 | -0.008763 | 0.094028  |
| 33 | 6  | 0 | -5.049122 | -0.764896 | 2.105468  |
| 34 | 1  | 0 | -6.084431 | -0.421472 | 2.188182  |
| 35 | 1  | 0 | -4.950763 | -1.706301 | 2.653994  |
| 36 | 1  | 0 | -4.395975 | -0.015916 | 2.564455  |
| 37 | 1  | 0 | 4.906472  | -1.693027 | -0.337837 |
| 38 | 1  | 0 | -0.962595 | -0.879026 | -2.219931 |
| 39 | 1  | 0 | -0.106898 | -2.364258 | -1.778554 |
| 40 | 16 | 0 | 2.104625  | -1.493828 | -0.523566 |
| 41 | 8  | 0 | 2.530627  | -2.046986 | -1.812957 |
| 42 | 8  | 0 | 1.844599  | -2.446234 | 0.563613  |
| 43 | 8  | 0 | -1.194095 | -1.081994 | 2.689061  |
| 44 | 1  | 0 | -2.015890 | -1.163317 | 2.179669  |
| 45 | 1  | 0 | -0.520456 | -1.118222 | 1.995919  |

Sum of electronic and zero-point Energies= -1658.818992

Sum of electronic and thermal Free Energies= -1658.876247

The number of imaginary frequencies: 0

TS-PPG(S<sub>1</sub>) in MeCN

| Center Number | Atomic Number | Atomic Type | Coordinates (Angstroms) |          |           |
|---------------|---------------|-------------|-------------------------|----------|-----------|
|               |               |             | X                       | Y        | Z         |
| 1             | 6             | 0           | -5.210632               | 1.683896 | -0.068381 |
| 2             | 6             | 0           | -5.589205               | 0.345365 | 0.046003  |



---

|    |    |   |           |           |           |
|----|----|---|-----------|-----------|-----------|
| 3  | 6  | 0 | -4.620679 | -0.652102 | 0.060532  |
| 4  | 6  | 0 | -3.277810 | -0.304400 | -0.042460 |
| 5  | 6  | 0 | -2.879560 | 1.039819  | -0.136137 |
| 6  | 6  | 0 | -3.871425 | 2.034119  | -0.152640 |
| 7  | 6  | 0 | 0.505590  | -1.859523 | 0.628130  |
| 8  | 6  | 0 | -0.592742 | -0.889328 | 0.291596  |
| 9  | 6  | 0 | -0.426622 | 0.462284  | 0.159597  |
| 10 | 6  | 0 | -1.467355 | 1.387661  | -0.128752 |
| 11 | 1  | 0 | -5.967261 | 2.461963  | -0.079037 |
| 12 | 1  | 0 | -6.637639 | 0.077817  | 0.124083  |
| 13 | 1  | 0 | -3.581741 | 3.077949  | -0.213441 |
| 14 | 8  | 0 | -1.127594 | 2.625209  | -0.309856 |
| 15 | 6  | 0 | 0.892841  | 1.139659  | 0.312192  |
| 16 | 6  | 0 | 1.400553  | 1.865078  | -0.781796 |
| 17 | 6  | 0 | 1.604068  | 1.108602  | 1.516196  |
| 18 | 6  | 0 | 2.604085  | 2.561424  | -0.660274 |
| 19 | 1  | 0 | 0.882504  | 1.837775  | -1.734661 |
| 20 | 6  | 0 | 2.802345  | 1.799051  | 1.624933  |
| 21 | 1  | 0 | 1.208535  | 0.559107  | 2.364260  |
| 22 | 6  | 0 | 3.305871  | 2.524475  | 0.536373  |
| 23 | 1  | 0 | 2.995335  | 3.110415  | -1.510744 |
| 24 | 1  | 0 | 3.349653  | 1.781477  | 2.562052  |
| 25 | 1  | 0 | 4.249213  | 3.053106  | 0.631603  |
| 26 | 8  | 0 | 1.587873  | -1.669073 | -0.297939 |
| 27 | 6  | 0 | 2.809069  | -1.526406 | 0.230834  |
| 28 | 8  | 0 | 3.125070  | -1.779973 | 1.371258  |
| 29 | 8  | 0 | 3.606414  | -1.064782 | -0.720794 |
| 30 | 6  | 0 | 4.967637  | -0.799403 | -0.323014 |
| 31 | 1  | 0 | 5.452691  | -1.747967 | -0.074085 |
| 32 | 1  | 0 | 4.954595  | -0.169203 | 0.570313  |
| 33 | 6  | 0 | 5.645020  | -0.107397 | -1.482303 |
| 34 | 1  | 0 | 6.684089  | 0.109290  | -1.215283 |
| 35 | 1  | 0 | 5.641986  | -0.740510 | -2.375004 |
| 36 | 1  | 0 | 5.143151  | 0.836728  | -1.716876 |
| 37 | 1  | 0 | -4.904788 | -1.696297 | 0.147130  |
| 38 | 1  | 0 | 0.873186  | -1.716577 | 1.646383  |
| 39 | 1  | 0 | 0.157632  | -2.891502 | 0.542385  |
| 40 | 16 | 0 | -2.108103 | -1.628241 | -0.191413 |
| 41 | 8  | 0 | -2.458258 | -2.685998 | 0.763898  |
| 42 | 8  | 0 | -2.030728 | -2.021503 | -1.605346 |

---

Sum of electronic and zero-point Energies= -1582.320886

Sum of electronic and thermal Free Energies= -1582.375097

The number of imaginary frequencies: 0

---

TS-PPG(S<sub>1</sub>) in MeOH

---

| Center<br>Number | Atomic<br>Number | Atomic<br>Type | Coordinates (Angstroms) |           |           |
|------------------|------------------|----------------|-------------------------|-----------|-----------|
|                  |                  |                | X                       | Y         | Z         |
| 1                | 6                | 0              | -5.158315               | 1.746845  | -0.078995 |
| 2                | 6                | 0              | -5.564799               | 0.415107  | 0.018847  |
| 3                | 6                | 0              | -4.618140               | -0.602383 | 0.035998  |
| 4                | 6                | 0              | -3.267467               | -0.277514 | -0.046660 |
| 5                | 6                | 0              | -2.840955               | 1.058857  | -0.125646 |
| 6                | 6                | 0              | -3.811490               | 2.071176  | -0.145412 |
| 7                | 6                | 0              | 0.487798                | -1.914496 | 0.631213  |
| 8                | 6                | 0              | -0.599547               | -0.929248 | 0.314286  |
| 9                | 6                | 0              | -0.415213               | 0.423434  | 0.184327  |
| 10               | 6                | 0              | -1.421132               | 1.378422  | -0.103896 |
| 11               | 1                | 0              | -5.899983               | 2.539323  | -0.091662 |
| 12               | 1                | 0              | -6.619378               | 0.168150  | 0.081881  |
| 13               | 1                | 0              | -3.494553               | 3.107782  | -0.196032 |
| 14               | 8                | 0              | -1.035568               | 2.603317  | -0.273669 |
| 15               | 6                | 0              | 0.904915                | 1.088295  | 0.334832  |
| 16               | 6                | 0              | 1.387602                | 1.841704  | -0.760616 |
| 17               | 6                | 0              | 1.633646                | 1.047828  | 1.529846  |
| 18               | 6                | 0              | 2.578060                | 2.564781  | -0.640903 |
| 19               | 1                | 0              | 0.872674                | 1.794826  | -1.713690 |
| 20               | 6                | 0              | 2.815484                | 1.760881  | 1.631126  |
| 21               | 1                | 0              | 1.257747                | 0.480394  | 2.374839  |
| 22               | 6                | 0              | 3.291104                | 2.518843  | 0.544453  |
| 23               | 1                | 0              | 2.949551                | 3.131778  | -1.487928 |
| 24               | 1                | 0              | 3.376970                | 1.743318  | 2.559611  |
| 25               | 1                | 0              | 4.226998                | 3.060225  | 0.639396  |
| 26               | 8                | 0              | 1.570363                | -1.704456 | -0.298601 |
| 27               | 6                | 0              | 2.792532                | -1.544460 | 0.215187  |
| 28               | 8                | 0              | 3.131972                | -1.816470 | 1.347864  |
| 29               | 8                | 0              | 3.563615                | -1.033364 | -0.729872 |
| 30               | 6                | 0              | 4.934127                | -0.761390 | -0.354463 |
| 31               | 1                | 0              | 5.427458                | -1.711629 | -0.131561 |
| 32               | 1                | 0              | 4.929765                | -0.144048 | 0.547976  |
| 33               | 6                | 0              | 5.577730                | -0.046878 | -1.518112 |
| 34               | 1                | 0              | 6.619565                | 0.177834  | -1.269137 |
| 35               | 1                | 0              | 5.563344                | -0.669307 | -2.418255 |
| 36               | 1                | 0              | 5.060853                | 0.894662  | -1.729818 |
| 37               | 1                | 0              | -4.926226               | -1.640955 | 0.109188  |
| 38               | 1                | 0              | 0.862283                | -1.795595 | 1.650004  |

|    |    |   |           |           |           |
|----|----|---|-----------|-----------|-----------|
| 39 | 1  | 0 | 0.141460  | -2.944044 | 0.519562  |
| 40 | 16 | 0 | -2.122473 | -1.621215 | -0.186816 |
| 41 | 8  | 0 | -2.509874 | -2.686809 | 0.751711  |
| 42 | 8  | 0 | -2.048583 | -2.023728 | -1.603404 |

Sum of electronic and zero-point Energies= -1582.318801

Sum of electronic and thermal Free Energies= -1582.372043

The number of imaginary frequencies: 0

TS-PPG(S<sub>1</sub>) in H<sub>2</sub>O

| Center<br>Number | Atomic<br>Number | Atomic<br>Type | Coordinates (Angstroms) |           |           |
|------------------|------------------|----------------|-------------------------|-----------|-----------|
|                  |                  |                | X                       | Y         | Z         |
| 1                | 6                | 0              | -5.144877               | 1.768924  | -0.083222 |
| 2                | 6                | 0              | -5.559177               | 0.439275  | 0.008080  |
| 3                | 6                | 0              | -4.618224               | -0.583322 | 0.026707  |
| 4                | 6                | 0              | -3.265268               | -0.265919 | -0.047739 |
| 5                | 6                | 0              | -2.831030               | 1.068258  | -0.121143 |
| 6                | 6                | 0              | -3.795990               | 2.085702  | -0.142242 |
| 7                | 6                | 0              | 0.480806                | -1.925087 | 0.630692  |
| 8                | 6                | 0              | -0.601485               | -0.933142 | 0.317861  |
| 9                | 6                | 0              | -0.409736               | 0.419161  | 0.191338  |
| 10               | 6                | 0              | -1.409882               | 1.380423  | -0.094318 |
| 11               | 1                | 0              | -5.881619               | 2.565355  | -0.096859 |
| 12               | 1                | 0              | -6.614942               | 0.197901  | 0.064942  |
| 13               | 1                | 0              | -3.473257               | 3.120282  | -0.188324 |
| 14               | 8                | 0              | -1.017137               | 2.605915  | -0.258183 |
| 15               | 6                | 0              | 0.914075                | 1.075141  | 0.343373  |
| 16               | 6                | 0              | 1.399674                | 1.830783  | -0.749452 |
| 17               | 6                | 0              | 1.644700                | 1.023671  | 1.536761  |
| 18               | 6                | 0              | 2.595400                | 2.544762  | -0.628780 |
| 19               | 1                | 0              | 0.882479                | 1.791581  | -1.701237 |
| 20               | 6                | 0              | 2.831339                | 1.728339  | 1.639082  |
| 21               | 1                | 0              | 1.266461                | 0.454039  | 2.378866  |
| 22               | 6                | 0              | 3.310270                | 2.487931  | 0.554922  |
| 23               | 1                | 0              | 2.969881                | 3.112058  | -1.473723 |
| 24               | 1                | 0              | 3.394480                | 1.702635  | 2.565848  |
| 25               | 1                | 0              | 4.250345                | 3.021007  | 0.650243  |
| 26               | 8                | 0              | 1.558690                | -1.729464 | -0.309015 |
| 27               | 6                | 0              | 2.784566                | -1.561923 | 0.199652  |
| 28               | 8                | 0              | 3.131713                | -1.837094 | 1.329755  |
| 29               | 8                | 0              | 3.547530                | -1.041286 | -0.748175 |
| 30               | 6                | 0              | 4.911815                | -0.739548 | -0.369533 |

|    |    |   |           |           |           |
|----|----|---|-----------|-----------|-----------|
| 31 | 1  | 0 | 5.428990  | -1.679847 | -0.161555 |
| 32 | 1  | 0 | 4.890821  | -0.136010 | 0.541568  |
| 33 | 6  | 0 | 5.535781  | 0.010430  | -1.521183 |
| 34 | 1  | 0 | 6.571275  | 0.256529  | -1.268211 |
| 35 | 1  | 0 | 5.536427  | -0.596229 | -2.431588 |
| 36 | 1  | 0 | 4.995265  | 0.942156  | -1.715158 |
| 37 | 1  | 0 | -4.932917 | -1.619804 | 0.094711  |
| 38 | 1  | 0 | 0.864185  | -1.803097 | 1.645350  |
| 39 | 1  | 0 | 0.125194  | -2.951782 | 0.527701  |
| 40 | 16 | 0 | -2.127910 | -1.616319 | -0.183715 |
| 41 | 8  | 0 | -2.523718 | -2.679036 | 0.755683  |
| 42 | 8  | 0 | -2.054958 | -2.023889 | -1.599849 |

Sum of electronic and zero-point Energies= -1582.314540

Sum of electronic and thermal Free Energies= -1582.367641

The number of imaginary frequencies: 0

TS-PPG(S<sub>1</sub>) with 1H<sub>2</sub>O

| Center Number | Atomic Number | Atomic Type | Coordinates (Angstroms) |           |           |
|---------------|---------------|-------------|-------------------------|-----------|-----------|
|               |               |             | X                       | Y         | Z         |
| 1             | 6             | 0           | 5.135188                | 1.793227  | 0.325652  |
| 2             | 6             | 0           | 5.565176                | 0.478971  | 0.138005  |
| 3             | 6             | 0           | 4.635641                | -0.539902 | -0.034211 |
| 4             | 6             | 0           | 3.278360                | -0.233924 | -0.016310 |
| 5             | 6             | 0           | 2.829496                | 1.086630  | 0.152666  |
| 6             | 6             | 0           | 3.782427                | 2.099687  | 0.328708  |
| 7             | 6             | 0           | -0.412998               | -1.827040 | -1.059067 |
| 8             | 6             | 0           | 0.654979                | -0.866806 | -0.632635 |
| 9             | 6             | 0           | 0.440816                | 0.466368  | -0.382452 |
| 10            | 6             | 0           | 1.409193                | 1.397291  | 0.064909  |
| 11            | 1             | 0           | 5.863050                | 2.586646  | 0.458993  |
| 12            | 1             | 0           | 6.624359                | 0.246394  | 0.125585  |
| 13            | 1             | 0           | 3.448996                | 3.124806  | 0.449531  |
| 14            | 8             | 0           | 0.995514                | 2.596842  | 0.328318  |
| 15            | 6             | 0           | -0.875416               | 1.130933  | -0.554040 |
| 16            | 6             | 0           | -1.425890               | 1.787070  | 0.573386  |
| 17            | 6             | 0           | -1.532112               | 1.194639  | -1.788449 |
| 18            | 6             | 0           | -2.606993               | 2.524459  | 0.445862  |
| 19            | 1             | 0           | -0.979002               | 1.635235  | 1.548265  |
| 20            | 6             | 0           | -2.706030               | 1.919648  | -1.897137 |
| 21            | 1             | 0           | -1.103961               | 0.704644  | -2.656182 |
| 22            | 6             | 0           | -3.246289               | 2.584652  | -0.779591 |

---

|    |    |   |           |           |           |
|----|----|---|-----------|-----------|-----------|
| 23 | 1  | 0 | -3.029883 | 3.015068  | 1.315528  |
| 24 | 1  | 0 | -3.210127 | 1.986331  | -2.855295 |
| 25 | 1  | 0 | -4.174714 | 3.136057  | -0.884028 |
| 26 | 8  | 0 | -1.452142 | -1.820665 | -0.048942 |
| 27 | 6  | 0 | -2.697751 | -1.525281 | -0.445949 |
| 28 | 8  | 0 | -3.114716 | -1.594505 | -1.582341 |
| 29 | 8  | 0 | -3.379887 | -1.147244 | 0.620861  |
| 30 | 6  | 0 | -4.738474 | -0.700489 | 0.393861  |
| 31 | 1  | 0 | -5.343973 | -1.566943 | 0.116177  |
| 32 | 1  | 0 | -4.732576 | 0.012383  | -0.434566 |
| 33 | 6  | 0 | -5.206689 | -0.061878 | 1.678701  |
| 34 | 1  | 0 | -6.232927 | 0.294378  | 1.549524  |
| 35 | 1  | 0 | -5.190223 | -0.780292 | 2.503620  |
| 36 | 1  | 0 | -4.572796 | 0.792226  | 1.937821  |
| 37 | 1  | 0 | 4.962366  | -1.564887 | -0.177592 |
| 38 | 1  | 0 | -0.854045 | -1.555443 | -2.019215 |
| 39 | 1  | 0 | -0.032118 | -2.846178 | -1.135346 |
| 40 | 16 | 0 | 2.143197  | -1.591904 | -0.078322 |
| 41 | 8  | 0 | 2.614746  | -2.573145 | -1.069729 |
| 42 | 8  | 0 | 1.965925  | -2.115221 | 1.289974  |
| 43 | 8  | 0 | -0.958544 | -0.679648 | 2.686885  |
| 44 | 1  | 0 | -1.822263 | -0.248256 | 2.734065  |
| 45 | 1  | 0 | -0.974286 | -1.082554 | 1.804617  |

---

Sum of electronic and zero-point Energies= -1658.701441

Sum of electronic and thermal Free Energies= -1658.758507

The number of imaginary frequencies: 0

---

## Notes and references

- 1 S. Kitani, K. Sugawara, K. Tsutsumi, T. Morimoto and K. Kakiuchi, *Chem. Commun.* 2008, **336**, 2103–2105.
- 2 J. Ma, X. Zhang, N. Basarić and D. L. Phillips, *J. Am. Chem. Soc.*, 2017, **139**, 18349–18357.
- 3 Y. Hu, F. Zhan, Q. Wang, Y. Sun, C. Yu, X. Zhao, H. Wang, R. Long, G. Zhang, C. Gao, W. Zhang, J. Jiang, Y. Tao and Y. Xiong, *J. Am. Chem. Soc.*, 2020, **142**, 5618–5626.
- 4 J. Da Chai and M. Head-Gordon, *Phys. Chem. Chem. Phys.*, 2008, **10**, 6615–6620.
- 5 H. B. Schlegel, *J. Comput. Chem.*, 1982, **3**, 214–218.
- 6 E. Cancès, B. Mennucci, J. Tomasi, *J. Chem. Phys.*, 1997, **107**, 3032–3041.
- 7 M. E. Casida and M. Huix-Rotllant, *Annu. Rev. Phys. Chem.*, 2012, **63**, 287–323.
- 8 L. Noodleman, T. Lovell, W. G. Han, J. Li and F. Himo, *Chem. Rev.*, 2004, **104**, 459–508.
- 9 A. V. Marenich, C. J. Cramer and D. G. Truhlar, *J. Phys. Chem. B*, 2009, **113**, 6378–6396.
- 10 M. J. Frisch, G. W. Trucks, H. B. Schlegel, G. E. Scuseria, M. A. Robb, J. R. Cheeseman, G. Scalmani, V. Barone, G. A. Petersson, H. Nakatsuji, X. Li, M. Caricato, A. V. Marenich, J. Bloino, B. G. Janesko, R. Gomperts, B. Mennucci, H. P. Hratchian, J. V. Ortiz, A. F. Izmaylov, J. L. Sonnenberg, D. Williams-Young, F. Ding, F. Lipparini, F. Egidi, J. Goings, B. Peng, A. Petrone, T. Henderson, D. Ranasinghe, V. G. Zakrzewski, J. Gao, N. Rega, G. Zheng, W. Liang, M. Hada, M. Ehara, K. Toyota, R. Fukuda, J. Hasegawa, M. Ishida, T. Nakajima, Y. Honda, O. Kitao, H. Nakai, T. Vreven, K. Throssell, J. A. Jr. Montgomery, J. E. Peralta, F. Ogliaro, M. J. Bearpark, J. J. Heyd, E. N. Brothers, K. N. Kudin, V. N. Staroverov, T. A. Keith, R. Kobayashi, J. Normand, K. Raghavachari, A. P. Rendell, J. C. Burant, S. S. Iyengar, J. Tomasi, M. Cossi, J. M. Millam, M. Klene, C. Adamo, R. Cammi, J. W. Ochterski, R. L. Martin, K. Morokuma, O. Farkas, J. B. Foresman, D. J. Fox, *Gaussian 16, rev. A.*, **03**, Gaussian, Inc.: Wallingford, CT, 2016.
- 11 Y. Zhang, H. Zhang, C. Ma, J. Li, Y. Nishiyama, H. Tanimoto, T. Morimoto and K. Kakiuchi, *Tetrahedron Lett.*, 2016, **57**, 5179–5184.
